# Supplementary material for: Hybridization but No Evidence for Backcrossing and Introgression in a Sympatric Population of Great Reed Warblers and Clamorous Reed Warblers
Source: PubMed Central journal article supplement (PMC3288047; doi:10.1371/journal.pone.0031667), 2012-02-27
Supplement: pone.0031667.s001.pdf [file pone.0031667.s001.pdf]

**Table S1** Summary of BLAST analyses of 181 great reed warbler (*Acrocephalus arundinaceus*) microsatellite sequences and four other avian microsatellite loci used in the present study against the zebra finch genome assembly (tgu3.2.4, build 1.1). BLAST hit statistics and chromosomal locations in the zebra finch genome are included. **Summary methods:** <http://www.ensembl.org/Multi/blastview>; Search tool: BLASTN; Search sensitivity: Distant homologues; Single hit criteria: E-value <1E-10; E-value 1E-10 lower, or score 100 higher, than second hit; double hits (not matching the single hit criteria) are given (grey shading) when (i) there are hits to both a chromosome and chromosome Unknown, and (ii) when there are two hits on the same chromosome.

| Clone No. | Clone ID | Accession number | Locus name | No. of hits | No. of chrs with hit | TguChr   | Start     | E-value   | Score | Length |
|-----------|----------|------------------|------------|-------------|----------------------|----------|-----------|-----------|-------|--------|
| 1         | 25_A01   | FM878097.1       | Aar9       | 2           | 1                    | 1        | 78662579  | 1.70E-67  | 264   | 377    |
| 1         | 25_A01   | FM878097.1       | Aar9       |             |                      | 1        | 78672118  | 6.40E-67  | 262   | 377    |
| 2         | 25_A02   | FM878098.1       | Aar10      | 1           | 1                    | 2        | 154345106 | 9.40E-22  | 77    | 79     |
| 3         | 25_A04   | FM878099.1       | Aar11      | 1           | 1                    | 3        | 23940825  | 6.30E-92  | 230   | 325    |
| 4         | 25_A05   | FM878100.1       | Aar12      | 1           | 1                    | 1        | 23935630  | 6.90E-24  | 72    | 85     |
| 5         | 25_A06   | FM878101.1       | Aar13      | 1           | 1                    | 5        | 45747352  | 6.40E-28  | 123   | 153    |
| 6         | 25_A07   | FM878102.1       | Aar14      | 1           | 1                    | 4        | 61150538  | 2.00E-93  | 205   | 260    |
| 7         | 25_B03   | FM878103.1       | Aar15      | 1           | 1                    | 4        | 46186384  | 1.30E-54  | 144   | 220    |
| 8         | 25_B06   | FM878104.1       | Aar16      |             |                      |          |           |           |       |        |
| 9         | 25_B08   | FM878105.1       | Aar17      |             |                      |          |           |           |       |        |
| 10        | 25_B11   | FM878106.1       | Aar18      | 1           | 1                    | 7        | 22168918  | 2.20E-93  | 279   | 374    |
| 11        | 25_B12   | FM878107.1       | Aar19      | 1           | 1                    | 11       | 21086707  | 6.70E-59  | 160   | 224    |
| 12        | 25_C01   | FM878108.1       | Aar20      |             |                      |          |           |           |       |        |
| 13        | 25_C02   | FM878109.1       | Aar21      | 1           | 1                    | 1        | 3265906   | 1.50E-30  | 84    | 215    |
| 14        | 25_C05   | FM878110.1       | Aar22      | 1           | 1                    | 1A       | 33601611  | 7.80E-53  | 175   | 220    |
| 15        | 25_C07   | FM878111.1       | Aar23      |             |                      |          |           |           |       |        |
| 16        | 25_C09   | FM878112.1       | Aar24      | 1           | 1                    | 2        | 57618520  | 4.20E-77  | 154   | 206    |
| 17        | 25_C12   | FM878113.1       | Aar25      |             |                      |          |           |           |       |        |
| 18        | 25_D02   | FM878114.1       | Aar26      | 1           | 1                    | Z        | 17576687  | 3.00E-90  | 241   | 378    |
| 19        | 25_D03   | FM878115.1       | Aar27      | 1           | 1                    | 6        | 16935712  | 2.40E-77  | 215   | 272    |
| 20        | 25_D04   | FM878116.1       | Aar28      |             |                      |          |           |           |       |        |
| 21        | 25_D09   | FM878117.1       | Aar29      | 1           | 1                    | 1A       | 13703457  | 6.10E-81  | 249   | 374    |
| 22        | 25_D11   | FM878118.1       | Aar30      | 1           | 1                    | 4        | 54326157  | 5.80E-43  | 177   | 275    |
| 23        | 25_E04   | FM878119.1       | Aar31      | 1           | 1                    | 5        | 54112319  | 2.90E-109 | 233   | 267    |
| 24        | 25_E07   | FM878120.1       | Aar32      |             |                      |          |           |           |       |        |
| 25        | 25_E08   | FM878121.1       | Aar33      | 1           | 1                    | 2        | 120725528 | 1.00E-30  | 109   | 111    |
| 26        | 25_E09   | FM878122.1       | Aar34      | 1           | 1                    | 4        | 41673588  | 2.80E-37  | 156   | 207    |
| 27        | 25_E10   | FM878123.1       | Aar35      |             |                      |          |           |           |       |        |
| 28        | 25_F01   | FM878124.1       | Aar36      | 1           | 1                    | 1        | 38287592  | 4.70E-80  | 234   | 312    |
| 29        | 25_F02   | FM878125.1       | Aar37      | 1           | 1                    | 3        | 73217086  | 7.40E-63  | 224   | 317    |
| 30        | 25_F03   | FM878126.1       | Aar38      | 1           | 1                    | 3        | 17786608  | 9.00E-59  | 222   | 246    |
| 31        | 25_F05b  | FM878127.1       | Aar39      | 1           | 1                    | 3        | 41866704  | 1.30E-97  | 326   | 334    |
| 32        | 25_F08   | FM878128.1       | Aar40      | 1           | 1                    | 19       | 9526604   | 8.60E-17  | 82    | 106    |
| 33        | 25_F10   | FM878129.1       | Aar41      | 1           | 1                    | 4        | 68635663  | 4.20E-39  | 158   | 240    |
| 34        | 25_F12   | FM878130.1       | Aar42      | 1           | 1                    | 3        | 61775447  | 2.30E-93  | 355   | 497    |
| 35        | 25_G01   | FM878131.1       | Aar43      | 1           | 1                    | 2        | 87604336  | 1.50E-54  | 195   | 362    |
| 36        | 25_G02   | FM878132.1       | Aar44      | 1           | 1                    | Z        | 35619640  | 3.90E-55  | 190   | 282    |
| 37        | 25_G04   | FM878133.1       | Aar45      | 1           | 1                    | 1        | 109851224 | 7.00E-141 | 417   | 504    |
| 38        | 25_G06   | FM878134.1       | Aar46      | 1           | 1                    | 3        | 63707888  | 3.90E-50  | 181   | 276    |
| 39        | 25_G07   | FM878135.1       | Aar47      | 1           | 1                    | 12       | 16121404  | 8.30E-111 | 239   | 328    |
| 40        | 25_G08   | FM878136.1       | Aar48      |             |                      |          |           |           |       |        |
| 41        | 25_G11   | FM878137.1       | Aar49      | 1           | 1                    | Z        | 40039853  | 1.30E-45  | 194   | 266    |
| 42        | 25_H04   | FM878138.1       | Aar50      | 1           | 1                    | 1        | 67643030  | 7.60E-49  | 169   | 231    |
| 43        | 25_H05   | FM878139.1       | Aar51      | 1           | 1                    | Z        | 9048311   | 1.00E-46  | 144   | 193    |
| 44        | 25_H07b  | FM878140.1       | Aar52      |             |                      |          |           |           |       |        |
| 45        | 25_H09   | FM878141.1       | Aar53      |             |                      |          |           |           |       |        |
| 46        | 25_H11   | FM878142.1       | Aar54      | 1           | 1                    | 3        | 50491696  | 2.40E-43  | 171   | 207    |
| 47        | 26_A01   | FM878143.1       | Aar55      |             |                      |          |           |           |       |        |
| 48        | 26_A04   | FM878144.1       | Aar56      | 1           | 1                    | 4A       | 14432228  | 5.20E-49  | 143   | 191    |
| 49        | 26_A06   | FM878145.1       | Aar57      | 1           | 1                    | 1        | 103980305 | 7.00E-76  | 173   | 236    |
| 50        | 26_A07   | FM878146.1       | Aar58      | 1           | 1                    | 6_random | 869614    | 2.90E-82  | 303   | 357    |
| 51        | 26_A08   | FM878147.1       | Aar59      | 1           | 1                    | Z        | 60274926  | 1.50E-83  | 243   | 330    |
| 52        | 26_A10   | FM878148.1       | Aar60      | 1           | 1                    | 12       | 2066012   | 6.30E-70  | 263   | 340    |
| 53        | 26_A12   | FM878149.1       | Aar61      |             |                      |          |           |           |       |        |
| 54        | 26_B06   | FM878150.1       | Aar62      | 1           | 1                    | 2        | 77041503  | 5.30E-31  | 108   | 134    |
| 55        | 26_B10   | FM878151.1       | Aar63      | 1           | 1                    | 2        | 76894740  | 9.00E-40  | 105   | 161    |

|     |         |            |        |   |   |           |           |           |     |     |
|-----|---------|------------|--------|---|---|-----------|-----------|-----------|-----|-----|
| 56  | 26_B11  | FM878152.1 | Aar64  | 1 | 1 | 1         | 29414305  | 1.50E-30  | 103 | 140 |
| 57  | 26_C01  | FM878153.1 | Aar65  | 1 | 1 | 12        | 16818782  | 1.50E-133 | 479 | 593 |
| 58  | 26_C03  | FM878154.1 | Aar66  | 1 | 1 | 2         | 31094360  | 4.60E-35  | 151 | 209 |
| 59  | 26_C07  | FM878155.1 | Aar67  | 1 | 1 | 5         | 59099169  | 5.90E-17  | 82  | 106 |
| 60  | 26_C08  | FM878156.1 | Aar68  | 2 | 2 | 1A        | 7319474   | 2.70E-61  | 215 | 287 |
| 60  | 26_C08  | FM878156.1 | Aar68  |   |   | Un        | 14676603  | 1.30E-59  | 219 | 287 |
| 61  | 26_C09  | FM878157.1 | Aar69  | 1 | 1 | 7         | 24293390  | 1.20E-79  | 232 | 300 |
| 62  | 26_C11  | FM878158.1 | Aar70  | 2 | 2 | 2         | 154055159 | 2.90E-124 | 246 | 290 |
| 62  | 26_C11  | FM878158.1 | Aar70  |   |   | Un        | 40355676  | 9.50E-125 | 246 | 289 |
| 63  | 26_C12  | FM878159.1 | Aar71  | 1 | 1 | 18        | 328152    | 1.30E-51  | 147 | 218 |
| 64  | 26_D02  | FM878160.1 | Aar72  | 1 | 1 | 3         | 6504564   | 7.00E-33  | 134 | 174 |
| 65  | 26_D03  | FM878161.1 | Aar73  | 1 | 1 | 1         | 86241856  | 7.10E-58  | 229 | 314 |
| 66  | 26_D05  | FM878162.1 | Aar74  | 1 | 1 | Z         | 63109404  | 3.50E-59  | 133 | 192 |
| 67  | 26_D06  | FM878163.1 | Aar75  | 1 | 1 | 1         | 112205779 | 4.00E-63  | 146 | 245 |
| 68  | 26_D08  | FM878164.1 | Aar76  | 1 | 1 | 1A        | 21179116  | 3.00E-90  | 225 | 272 |
| 69  | 26_D10  | FM878165.1 | Aar77  | 1 | 1 | 3         | 81261081  | 3.20E-108 | 204 | 292 |
| 70  | 26_D12  | FM878166.1 | Aar78  |   |   |           |           |           |     |     |
| 71  | 26_E01  | FM878167.1 | Aar79  | 1 | 1 | 1         | 70588689  | 1.60E-96  | 197 | 264 |
| 72  | 26_E02  | FM878168.1 | Aar80  |   |   |           |           |           |     |     |
| 73  | 26_E03  | FM878169.1 | Aar81  | 2 | 1 | 6         | 26869936  | 3.00E-35  | 144 | 168 |
| 73  | 26_E03  | FM878169.1 | Aar81  |   |   | 6         | 26876850  | 2.40E-34  | 144 | 168 |
| 74  | 26_E04  | FM878170.1 | Aar82  |   |   |           |           |           |     |     |
| 75  | 26_E06  | FM878171.1 | Aar83  | 1 | 1 | 2         | 126962817 | 1.50E-47  | 147 | 228 |
| 76  | 26_E11  | FM878172.1 | Aar84  | 2 | 2 | 10        | 16879330  | 2.30E-68  | 133 | 180 |
| 76  | 26_E11  | FM878172.1 | Aar84  |   |   | Un        | 87827184  | 3.80E-62  | 131 | 180 |
| 77  | 26_F01  | FM878173.1 | Aar85  | 2 | 2 | 3         | 11316725  | 1.60E-67  | 237 | 247 |
| 77  | 26_F01  | FM878173.1 | Aar85  |   |   | Un        | 31126367  | 6.40E-68  | 239 | 247 |
| 78  | 26_F02  | FM878174.1 | Aar86  | 2 | 2 | 1A        | 7762272   | 2.30E-62  | 188 | 289 |
| 78  | 26_F02  | FM878174.1 | Aar86  |   |   | Un        | 8298542   | 1.40E-61  | 192 | 289 |
| 79  | 26_F05  | FM878175.1 | Aar87  | 2 | 2 | 4         | 63061310  | 7.40E-64  | 242 | 302 |
| 79  | 26_F05  | FM878175.1 | Aar87  |   |   | Un        | 45830658  | 4.50E-63  | 240 | 302 |
| 80  | 26_F11  | FM878176.1 | Aar88  | 1 | 1 | 1         | 72887978  | 6.00E-71  | 276 | 377 |
| 81  | 26_G01  | FM878177.1 | Aar89  | 1 | 1 | 9         | 19809751  | 3.90E-82  | 257 | 344 |
| 82  | 26_G02  | FM878178.1 | Aar90  | 1 | 1 | 1         | 2907364   | 3.20E-103 | 280 | 416 |
| 83  | 26_G04  | FM878179.1 | Aar91  | 1 | 1 | 2         | 37026659  | 1.50E-101 | 376 | 427 |
| 84  | 26_G06  | FM878180.1 | Aar92  |   |   |           |           |           |     |     |
| 85  | 26_G08  | FM878181.1 | Aar93  | 1 | 1 | 3         | 32921220  | 2.60E-21  | 97  | 145 |
| 86  | 26_G11  | FM878182.1 | Aar94  | 1 | 1 | 4         | 44229627  | 1.10E-96  | 231 | 295 |
| 87  | 26_H04  | FM878183.1 | Aar95  | 2 | 2 | 2         | 52306504  | 1.20E-75  | 296 | 377 |
| 87  | 26_H04  | FM878183.1 | Aar95  |   |   | Un        | 133064525 | 5.20E-79  | 302 | 377 |
| 88  | 26_H06  | FM878184.1 | Aar96  | 1 | 1 | 3         | 87265586  | 1.20E-42  | 118 | 159 |
| 89  | 26_H08  | FM878185.1 | Aar97  | 1 | 1 | 1         | 23316476  | 2.30E-27  | 128 | 157 |
| 90  | 26_H09  | FM878186.1 | Aar98  | 1 | 1 | 3         | 91263342  | 3.40E-24  | 87  | 107 |
| 91  | 27_A05  | FM878187.1 | Aar99  | 1 | 1 | 2         | 45299624  | 7.60E-55  | 161 | 195 |
| 92  | 27_A07  | FM878188.1 | Aar100 | 1 | 1 | 5         | 32712638  | 1.40E-44  | 146 | 222 |
| 93  | 27_A10  | FM878189.1 | Aar101 | 1 | 1 | Z         | 61000952  | 9.40E-18  | 90  | 103 |
| 94  | 27_B02  | FM878190.1 | Aar102 |   |   |           |           |           |     |     |
| 95  | 27_B04  | FM878191.1 | Aar103 | 1 | 1 | 7         | 2735923   | 1.80E-72  | 228 | 232 |
| 96  | 27_B06  | FM878192.1 | Aar104 | 2 | 2 | 4         | 9675214   | 2.20E-33  | 134 | 158 |
| 96  | 27_B06  | FM878192.1 | Aar104 |   |   | Un        | 9830441   | 7.40E-34  | 136 | 158 |
| 97  | 27_B07b | FM878193.1 | Aar105 | 1 | 1 | 2         | 100440436 | 1.20E-98  | 333 | 509 |
| 98  | 27_B09  | FM878194.1 | Aar106 | 1 | 1 | 5         | 1054380   | 6.90E-78  | 177 | 232 |
| 99  | 27_B12  | FM878195.1 | Aar107 | 1 | 1 | 8         | 15112931  | 1.90E-50  | 161 | 218 |
| 100 | 27_C01  | FM878196.1 | Aar108 | 1 | 1 | 24        | 234487    | 3.90E-33  | 142 | 181 |
| 101 | 27_C02  | FM878197.1 | Aar109 | 1 | 1 | 1         | 72780799  | 8.30E-104 | 322 | 468 |
| 102 | 27_C05  | FM878198.1 | Aar110 | 1 | 1 | 2         | 38628781  | 7.10E-41  | 174 | 274 |
| 103 | 27_C07  | FM878199.1 | Aar111 | 1 | 1 | 17        | 3227358   | 2.40E-79  | 120 | 124 |
| 104 | 27_C09  | FM878200.1 | Aar112 | 1 | 1 | 5         | 42151037  | 2.60E-116 | 409 | 644 |
| 105 | 27_C10  | FM878201.1 | Aar113 | 2 | 2 | 1A        | 14268544  | 1.80E-109 | 273 | 352 |
| 105 | 27_C10  | FM878201.1 | Aar113 |   |   | Un        | 24206086  | 9.30E-111 | 278 | 352 |
| 106 | 27_C11  | FM878202.1 | Aar114 |   |   |           |           |           |     |     |
| 107 | 27_D01  | FM878203.1 | Aar115 | 1 | 1 | 13_random | 1500058   | 5.40E-40  | 163 | 21  |
| 108 | 27_D03  | FM878204.1 | Aar116 | 1 | 1 | 2         | 153399249 | 7.00E-57  | 140 | 188 |
| 109 | 27_D10  | FM878205.1 | Aar117 | 1 | 1 | 4         | 39851603  | 1.60E-57  | 184 | 227 |
| 110 | 27_E01  | FM878206.1 | Aar118 |   |   |           |           |           |     |     |
| 111 | 27_E02  | FM878207.1 | Aar119 | 1 | 1 | 3         | 82776170  | 2.90E-87  | 326 | 454 |
| 112 | 27_E06  | FM878208.1 | Aar120 | 1 | 1 | Z         | 43145810  | 4.30E-24  | 111 | 182 |

|     |         |            |        |   |   |    |           |           |     |     |
|-----|---------|------------|--------|---|---|----|-----------|-----------|-----|-----|
| 113 | 27_E07  | FM878209.1 | Aar121 | 1 | 1 | 3  | 58597279  | 8.10E-68  | 159 | 316 |
| 114 | 27_E09  | FM878210.1 | Aar122 | 1 | 1 | 6  | 31599733  | 1.10E-12  | 68  | 85  |
| 115 | 27_F03  | FM878211.1 | Aar123 | 2 | 1 | 6  | 106327    | 1.70E-64  | 164 | 229 |
| 115 | 27_F03  | FM878211.1 | Aar123 |   |   | 6  | 114183    | 8.40E-58  | 138 | 234 |
| 116 | 27_F07  | FM878212.1 | Aar124 | 1 | 1 | 3  | 68194138  | 9.10E-82  | 187 | 216 |
| 117 | 27_F10  | FM878213.1 | Aar125 | 1 | 1 | 3  | 20725186  | 7.60E-88  | 336 | 436 |
| 118 | 27_G04  | FM878214.1 | Aar126 | 1 | 1 | 3  | 42629053  | 1.60E-53  | 213 | 250 |
| 119 | 27_G06  | FM878215.1 | Aar127 | 1 | 1 | 1  | 49913526  | 1.20E-99  | 211 | 276 |
| 120 | 27_G07  | FM878216.1 | Aar128 | 1 | 1 | 3  | 75947358  | 2.90E-103 | 203 | 287 |
| 121 | 27_G08b | FM878217.1 | Aar129 | 2 | 2 | 1  | 38125037  | 1.10E-61  | 223 | 292 |
| 121 | 27_G08b | FM878217.1 | Aar129 |   |   | Un | 99820199  | 1.80E-60  | 223 | 304 |
| 122 | 27_H08  | FM878218.1 | Aar130 | 1 | 1 | 2  | 49274114  | 4.20E-26  | 109 | 148 |
| 123 | 27_H11  | FM878219.1 | Aar131 |   |   |    |           |           |     |     |
| 124 | 27_H12  | FM878220.1 | Aar132 | 1 | 1 | 3  | 85993527  | 2.80E-71  | 223 | 271 |
| 125 | 28_A06  | FM878221.1 | Aar133 | 1 | 1 | Z  | 22817318  | 4.20E-73  | 238 | 370 |
| 126 | 28_A07  | FM878222.1 | Aar134 |   |   |    |           |           |     |     |
| 127 | 28_B02  | FM878223.1 | Aar135 | 1 | 1 | 5  | 17449268  | 4.80E-79  | 305 | 499 |
| 128 | 28_B04  | FM878224.1 | Aar136 |   |   |    |           |           |     |     |
| 129 | 28_B06  | FM878225.1 | Aar137 |   |   |    |           |           |     |     |
| 130 | 28_B08  | FM878226.1 | Aar138 | 1 | 1 | 3  | 63078555  | 6.80E-74  | 240 | 360 |
| 131 | 28_B10  | FM878227.1 | Aar139 | 2 | 1 | 12 | 12355308  | 1.50E-47  | 114 | 123 |
| 131 | 28_B10  | FM878227.1 | Aar139 |   |   | 12 | 12352419  | 5.90E-47  | 112 | 123 |
| 132 | 28_B12  | FM878228.1 | Aar140 | 1 | 1 | 7  | 31491525  | 4.50E-44  | 116 | 150 |
| 133 | 28_C01  | FM878229.1 | Aar141 | 1 | 1 | Z  | 13548109  | 8.00E-105 | 248 | 410 |
| 134 | 28_C03  | FM878230.1 | Aar142 | 1 | 1 | 4  | 38048181  | 6.40E-144 | 352 | 411 |
| 135 | 28_C05  | FM878231.1 | Aar143 | 1 | 1 | 8  | 1604904   | 3.00E-60  | 133 | 230 |
| 136 | 28_C08  | FM878232.1 | Aar144 | 1 | 1 | 2  | 147855609 | 1.20E-58  | 230 | 562 |
| 137 | 28_C09  | FM878233.1 | Aar145 | 1 | 1 | 26 | 2578572   | 5.30E-62  | 236 | 332 |
| 138 | 28_C10  | FM878234.1 | Aar146 | 2 | 2 | 7  | 28339875  | 3.00E-85  | 256 | 312 |
| 138 | 28_C10  | FM878234.1 | Aar146 |   |   | Un | 73081911  | 1.10E-83  | 256 | 312 |
| 139 | 28_C12  | FM878235.1 | Aar147 |   |   |    |           |           |     |     |
| 140 | 28_E04  | FM878236.1 | Aar148 | 1 | 1 | 2  | 94298311  | 2.90E-82  | 230 | 343 |
| 141 | 28_E05  | FM878237.1 | Aar149 |   |   |    |           |           |     |     |
| 142 | 28_E09  | FM878238.1 | Aar150 | 1 | 1 | 4  | 37235907  | 2.10E-129 | 471 | 664 |
| 143 | 28_E11  | FM878239.1 | Aar151 | 1 | 1 | 3  | 43753567  | 3.40E-58  | 142 | 172 |
| 144 | 28_F03  | FM878240.1 | Aar152 | 2 | 2 | 1A | 38909898  | 2.10E-103 | 377 | 566 |
| 144 | 28_F03  | FM878240.1 | Aar152 |   |   | Un | 174970140 | 2.10E-103 | 377 | 566 |
| 145 | 28_G01  | FM878241.1 | Aar153 |   |   |    |           |           |     |     |
| 146 | 28_G02  | FM878242.1 | Aar154 |   |   |    |           |           |     |     |
| 147 | 28_G04  | FM878243.1 | Aar155 | 1 | 1 | 3  | 3250337   | 8.50E-116 | 340 | 395 |
| 148 | 28_G09  | FM878244.1 | Aar156 | 1 | 1 | 27 | 2040377   | 4.00E-93  | 342 | 456 |
| 149 | 28_G11  | FM878245.1 | Aar157 | 1 | 1 | 2  | 7034086   | 5.10E-126 | 355 | 485 |
| 150 | 28_G12  | FM878246.1 | Aar158 | 1 | 1 | 2  | 73327265  | 9.80E-105 | 287 | 351 |
| 151 | 28_H01  | FM878247.1 | Aar159 | 1 | 1 | 3  | 21425185  | 3.80E-96  | 361 | 474 |
| 152 | 28_H07  | FM878248.1 | Aar160 | 2 | 2 | 1  | 110144292 | 1.20E-59  | 209 | 307 |
| 152 | 28_H07  | FM878248.1 | Aar160 |   |   | Un | 160555905 | 6.80E-60  | 207 | 309 |
| 153 | 29_A02  | FM878249.1 | Aar161 | 2 | 1 | 19 | 4665090   | 1.10E-55  | 129 | 182 |
| 153 | 29_A02  | FM878249.1 | Aar161 |   |   | 19 | 4669315   | 1.10E-55  | 110 | 177 |
| 154 | 29_A03  | FM878250.1 | Aar162 |   |   |    |           |           |     |     |
| 155 | 29_A06  | FM878251.1 | Aar163 | 1 | 1 | 11 | 7678737   | 4.70E-136 | 425 | 439 |
| 156 | 29_A11  | FM878252.1 | Aar164 | 1 | 1 | 2  | 65767247  | 4.20E-77  | 304 | 384 |
| 157 | 29_B01  | FM878253.1 | Aar165 | 2 | 2 | 24 | 3862869   | 2.70E-23  | 70  | 129 |
| 157 | 29_B01  | FM878253.1 | Aar165 |   |   | Un | 57151022  | 8.00E-19  | 61  | 130 |
| 158 | 29_B07  | FM878254.1 | Aar166 | 2 | 1 | 2  | 120639789 | 6.80E-113 | 419 | 583 |
| 158 | 29_B07  | FM878254.1 | Aar166 |   |   | 2  | 120536256 | 1.50E-110 | 411 | 586 |
| 159 | 29_B12  | FM878255.1 | Aar167 | 1 | 1 | 2  | 112183915 | 2.60E-20  | 101 | 208 |
| 160 | 29_C01  | FM878256.1 | Aar168 | 1 | 1 | 7  | 26103167  | 6.70E-120 | 300 | 422 |
| 161 | 29_C04  | FM878257.1 | Aar169 |   |   |    |           |           |     |     |
| 162 | 29_C07  | FM878258.1 | Aar170 | 1 | 1 | Z  | 41196678  | 2.80E-83  | 193 | 294 |
| 163 | 29_C10  | FM878259.1 | Aar171 | 2 | 2 | 2  | 53417994  | 1.30E-73  | 292 | 363 |
| 163 | 29_C10  | FM878259.1 | Aar171 |   |   | Un | 38072360  | 1.90E-78  | 292 | 363 |
| 164 | 29_D02  | FM878260.1 | Aar172 | 1 | 1 | 1  | 47599384  | 1.80E-35  | 111 | 199 |
| 165 | 29_D03  | FM878261.1 | Aar173 | 1 | 1 | 2  | 135836899 | 5.20E-126 | 312 | 376 |
| 166 | 29_D06  | FM878262.1 | Aar174 | 1 | 1 | 1A | 35687229  | 1.90E-68  | 142 | 195 |
| 167 | 29_D07  | FM878263.1 | Aar175 |   |   |    |           |           |     |     |
| 168 | 29_D09  | FM878264.1 | Aar176 | 1 | 1 | 2  | 40785262  | 7.70E-69  | 206 | 292 |
| 169 | 29_E03  | FM878265.1 | Aar177 | 2 | 1 | 2  | 45061284  | 2.10E-57  | 177 | 246 |

|     |        |            |              |   |   |    |          |           |     |     |
|-----|--------|------------|--------------|---|---|----|----------|-----------|-----|-----|
| 169 | 29_E03 | FM878265.1 | Aar177       |   |   | 2  | 45065312 | 3.00E-56  | 173 | 246 |
| 170 | 29_E08 | FM878266.1 | Aar178       | 1 | 1 | 3  | 76392648 | 5.00E-82  | 313 | 409 |
| 171 | 29_E09 | FM878267.1 | Aar179       | 1 | 1 | 7  | 30760030 | 4.90E-158 | 570 | 667 |
| 172 | 29_E12 | FM878268.1 | Aar180       | 1 | 1 | 18 | 9729266  | 9.10E-37  | 105 | 195 |
| 173 | 29_F01 | FM878269.1 | Aar181       |   |   |    |          |           |     |     |
| 174 | 29_F03 | FM878270.1 | Aar182       | 1 | 1 | 1A | 43479781 | 4.90E-70  | 246 | 343 |
| 175 | 29_F04 | FM878271.1 | Aar183       | 2 | 1 | 1A | 54500979 | 3.70E-39  | 134 | 209 |
| 175 | 29_F04 | FM878271.1 | Aar183       |   |   | 1A | 54497127 | 7.20E-39  | 133 | 210 |
| 176 | 29_G02 | FM878272.1 | Aar184       | 1 | 1 | 1  | 29117117 | 4.00E-31  | 96  | 118 |
| 177 | 29_G03 | FM878273.1 | Aar185       |   |   |    |          |           |     |     |
| 178 | 29_G07 | FM878274.1 | Aar186       | 1 | 1 | 1A | 43476341 | 4.90E-78  | 304 | 418 |
| 179 | 29_G09 | FM878275.1 | Aar187       | 1 | 1 | 11 | 15526307 | 6.70E-150 | 516 | 569 |
| 180 | 29_H09 | FM878276.1 | Aar188       |   |   |    |          |           |     |     |
| 181 | 29_H11 | FM878277.1 | Aar189       | 1 | 1 | 1A | 55540639 | 4.20E-44  | 168 | 216 |
|     |        | AJ276375.1 | Ase18        |   |   | 3  | 13906080 | 5.90E-28  | 85  | 87  |
|     |        | AM072445.1 | Calex-01     |   |   | 1A | 45578197 | 1.30E-40  | 122 | 129 |
|     |        | AY769692.1 | DkiD126_ZEST |   |   | 1  | 4701224  | 5.10E-46  | 46  | 108 |
|     |        | DV955012.1 | Tgu03        |   |   | 7  | 9322153  | 9.10E-141 | 355 | 355 |
