# Supplementary material for: Hybridization but No Evidence for Backcrossing and Introgression in a Sympatric Population of Great Reed Warblers and Clamorous Reed Warblers
Source: PubMed Central journal article supplement (PMC3288047; doi:10.1371/journal.pone.0031667), 2012-02-27
Supplement: pone.0031667.s002.pdf [file pone.0031667.s002.pdf]

**Table S2** Characteristics of 181 great reed warbler (*Acrocephalus arundinaceus*) microsatellite loci isolated and characterised in this study. Primer sequences, expected and observed product size, melting ( $T_m$ ) and annealing ( $T_a$ ) temperatures, 5'-fluoro-label, and amplification success in four test individuals are shown.

| Locus name | Accession number | Repeat motif                 | Motif length | Motif start | Motif end | Sequence length | Exp prod size | $T_m$ | Label | Ta | Mono/ Poly | Observed fragment length |  |
|------------|------------------|------------------------------|--------------|-------------|-----------|-----------------|---------------|-------|-------|----|------------|--------------------------|--|
| Aar9       | FM878097.1       | TTTC                         | 21           | 405         | 488       | 570             | 374           | 65.2  |       |    |            |                          |  |
|            | Aar9F            | ACCTTCATGCTGATGAAATAATTGTGG  |              |             |           |                 |               |       |       |    |            |                          |  |
|            | Aar9R            | GGGCCACTAACCTGGAAAGACAG      |              |             |           |                 |               |       |       |    |            |                          |  |
| Aar10      | FM878098.1       | TT                           | 5            | 235         | 244       | 352             | 297           | 65.2  | Hex   | 63 | P          | 280-363                  |  |
|            | Aar10F           | TCTTCTCCATAAGCTCCATGTCTGG    |              |             |           |                 |               |       |       |    |            |                          |  |
|            | Aar10R           | CCGAGGAGCACCCACACTTC         |              |             |           |                 |               |       |       |    |            |                          |  |
| Aar11      | FM878099.1       | TTTT                         | 5            | 465         | 484       | 632             | 287           | 63.9  | Fam   | 62 | M          | 292                      |  |
|            | Aar11F           | CATTAAAGCACAGGAGGTTTGTGG     |              |             |           |                 |               |       |       |    |            |                          |  |
|            | Aar11R           | AAGCCCTGGAGTACATTGGCTAAG     |              |             |           |                 |               |       |       |    |            |                          |  |
| Aar12      | FM878100.1       | TTTC                         | 9            | 101         | 136       | 389             | 337           | 65.0  |       |    |            |                          |  |
|            | Aar12F           | GCATTGGTTCTATGAAGGAGAATTAACG |              |             |           |                 |               |       |       |    |            |                          |  |
|            | Aar12R           | AAGGGCAAAGCCTTCTGTATCTGAG    |              |             |           |                 |               |       |       |    |            |                          |  |
| Aar13      | FM878101.1       | AG                           | 9            | 91          | 108       | 393             | 288           | 60.9  |       |    |            |                          |  |
|            | Aar13F           | GCTTAGCTATCAAATGATTAAAGGAAAA |              |             |           |                 |               |       |       |    |            |                          |  |
|            | Aar13R           | TCCACGTGAAGTAAGTGAAGTAACTGAA |              |             |           |                 |               |       |       |    |            |                          |  |
| Aar14      | FM878102.1       | AAGAA                        | 30           | 226         | 375       | 637             | 395           | 65.5  |       |    |            |                          |  |
|            | Aar14F           | CCTCCAGACTGCGCTTGATAC        |              |             |           |                 |               |       |       |    |            |                          |  |
|            | Aar14R           | TCCTGAGTTTCCCAACTATGCTTACG   |              |             |           |                 |               |       |       |    |            |                          |  |
| Aar15      | FM878103.1       | GA                           | 8            | 155         | 170       | 391             | 263           | 60.8  |       |    |            |                          |  |
|            | Aar15F           | TGTAGGAATATTTGTTCCAGAATC     |              |             |           |                 |               |       |       |    |            |                          |  |
|            | Aar15R           | ACATTAACTCCATCAAGCTCACATC    |              |             |           |                 |               |       |       |    |            |                          |  |
| Aar16      | FM878104.1       | TGGGA                        | 5            | 31          | 55        | 409             | NA            | NA    |       |    |            |                          |  |
|            | Aar16F           | NA                           |              |             |           |                 |               |       |       |    |            |                          |  |
|            | Aar16R           | NA                           |              |             |           |                 |               |       |       |    |            |                          |  |
| Aar17      | FM878105.1       | AA                           | 5            | 161         | 170       | 556             | 400           | 63.2  |       |    |            |                          |  |
|            | Aar17F           | GCACTGGGTGAGGGAATATGAG       |              |             |           |                 |               |       |       |    |            |                          |  |
|            | Aar17R           | CTTGGAGGTTTCACACTCTGCAC      |              |             |           |                 |               |       |       |    |            |                          |  |
| Aar18      | FM878106.1       | AA                           | 5            | 165         | 174       | 726             | 288           | 64.8  | Fam   | 63 | P          | 259-288                  |  |
|            | Aar18F           | GCCACCACACAAGAAGTACATTGG     |              |             |           |                 |               |       |       |    |            |                          |  |
|            | Aar18R           | CTCCTCGCCACAGCTGACTG         |              |             |           |                 |               |       |       |    |            |                          |  |
| Aar19      | FM878107.1       | TGTG                         | 7            | 253         | 280       | 416             | 218           | 63.3  | Fam   | 61 | P          | 218-223                  |  |
|            | Aar19F           | TGAGCTGATATCCAGATGATGTGTG    |              |             |           |                 |               |       |       |    |            |                          |  |
|            | Aar19R           | TTCCTAGGCAATTTATGCCATAGT     |              |             |           |                 |               |       |       |    |            |                          |  |
| Aar20      | FM878108.1       | TCTA                         | 11           | 1           | 44        | 432             | NA            | NA    |       |    |            |                          |  |
|            | Aar20F           | NA                           |              |             |           |                 |               |       |       |    |            |                          |  |
|            | Aar20R           | NA                           |              |             |           |                 |               |       |       |    |            |                          |  |
| Aar21      | FM878109.1       | TTCTT                        | 16           | 106         | 185       | 482             | 271           | 63.2  |       |    |            |                          |  |
|            | Aar21F           | TCCTGGAAAGCTGAGTTTATACTGTTG  |              |             |           |                 |               |       |       |    |            |                          |  |
|            | Aar21R           | TGGTAAAGTGCCATTGCTACCAG      |              |             |           |                 |               |       |       |    |            |                          |  |
| Aar22      | FM878110.1       | GAAA                         | 35           | 405         | 544       | 628             | 350           | 64.7  |       |    |            |                          |  |
|            | Aar22F           | TTCAGCCTTGGTCTGCATTACG       |              |             |           |                 |               |       |       |    |            |                          |  |

|       |            |                                |    |     |     |     |     |      |     |    |   |         |  |
|-------|------------|--------------------------------|----|-----|-----|-----|-----|------|-----|----|---|---------|--|
|       | Aar22R     | AGCAACTGCATGGAACCTGTGC         |    |     |     |     |     |      |     |    |   |         |  |
| Aar23 | FM878111.1 | GAAA                           | 30 | 109 | 228 | 554 | 500 | 60.7 |     |    |   |         |  |
|       | Aar23F     | GATGTTCTGGTGAATCAATAAGTAGAGT   |    |     |     |     |     |      |     |    |   |         |  |
|       | Aar23R     | AAGAAGGGAAATACACCAATTATTTCT    |    |     |     |     |     |      |     |    |   |         |  |
| Aar24 | FM878112.1 | TCTT                           | 13 | 317 | 368 | 563 | 380 | 63.9 |     |    |   |         |  |
|       | Aar24F     | AATGTCTGTGTTACCTGGAGCACTTC     |    |     |     |     |     |      |     |    |   |         |  |
|       | Aar24R     | TTGAACAGAGTAAATGAGAAGGCATTG    |    |     |     |     |     |      |     |    |   |         |  |
| Aar25 | FM878113.1 | GGAA                           | 25 | 161 | 260 | 638 | 559 | 64.6 |     |    |   |         |  |
|       | Aar25F     | TGAGGGTCATGATGGCTGATG          |    |     |     |     |     |      |     |    |   |         |  |
|       | Aar25R     | TGAAGAGTTGGTATTAAGGAGAATTCAAGC |    |     |     |     |     |      |     |    |   |         |  |
| Aar26 | FM878114.1 | TATT                           | 6  | 661 | 684 | 805 | 233 | 64.3 |     |    |   |         |  |
|       | Aar26F     | GCATTGAGTCGAAATACTGCATGTAAG    |    |     |     |     |     |      |     |    |   |         |  |
|       | Aar26R     | TTCAGGGTCCAAAGCCAACC           |    |     |     |     |     |      |     |    |   |         |  |
| Aar27 | FM878115.1 | GT                             | 6  | 121 | 132 | 420 | 220 | 64.4 | Hex | 62 | P | 220-226 |  |
|       | Aar27F     | CAGAAAGGAGAATTGGGATGCAC        |    |     |     |     |     |      |     |    |   |         |  |
|       | Aar27R     | CATTTCATAGGAGTGCAACTCTCAAGC    |    |     |     |     |     |      |     |    |   |         |  |
| Aar28 | FM878116.1 | AAGG                           | 20 | 149 | 228 | 536 | 519 | 60.3 |     |    |   |         |  |
|       | Aar28F     | CCCCTTTTGTCTGTAACAACTATTGA     |    |     |     |     |     |      |     |    |   |         |  |
|       | Aar28R     | TCTCCTCCTCTATTCAATAAGCAATC     |    |     |     |     |     |      |     |    |   |         |  |
| Aar29 | FM878117.1 | TAGA                           | 11 | 449 | 492 | 642 | 342 | 64.9 |     |    |   |         |  |
|       | Aar29F     | TTTGGAAGGACCACATACAGAGAAGTC    |    |     |     |     |     |      |     |    |   |         |  |
|       | Aar29R     | TGTGCATGGGACATGGTGTG           |    |     |     |     |     |      |     |    |   |         |  |
| Aar30 | FM878118.1 | TTCT                           | 13 | 277 | 328 | 522 | 297 | 65.0 |     |    |   |         |  |
|       | Aar30F     | GCACTTGATGTAAACGCCTTGTCTT      |    |     |     |     |     |      |     |    |   |         |  |
|       | Aar30R     | TGGTCTCCAGGCAGAACCAAA          |    |     |     |     |     |      |     |    |   |         |  |
| Aar31 | FM878119.1 | TGTG                           | 10 | 269 | 308 | 610 | 262 | 65.7 |     |    |   |         |  |
|       | Aar31F     | GGCTGGGAAGAATCCCATGATAAG       |    |     |     |     |     |      |     |    |   |         |  |
|       | Aar31R     | GGGCTAATGTTTAGGCCATTGTGTTTC    |    |     |     |     |     |      |     |    |   |         |  |
| Aar32 | FM878120.1 | AAAG                           | 16 | 389 | 452 | 746 | 487 | 60.8 |     |    |   |         |  |
|       | Aar32F     | AGGTCCTTATAAACACAAGAGAGCTG     |    |     |     |     |     |      |     |    |   |         |  |
|       | Aar32R     | AAACATTTAGAAAGCATCCAGCAG       |    |     |     |     |     |      |     |    |   |         |  |
| Aar33 | FM878121.1 | GATA                           | 14 | 69  | 124 | 252 | 230 | 60.3 | Hex | 58 | P | 223-243 |  |
|       | Aar33F     | TTTCAGTTGGAAGATTTTCAGAGAG      |    |     |     |     |     |      |     |    |   |         |  |
|       | Aar33R     | ACATTGGCAGTATGAAGCATAAC        |    |     |     |     |     |      |     |    |   |         |  |
| Aar34 | FM878122.1 | TCTA                           | 11 | 21  | 64  | 485 | NA  | NA   |     |    |   |         |  |
|       | Aar34F     | NA                             |    |     |     |     |     |      |     |    |   |         |  |
|       | Aar34R     | NA                             |    |     |     |     |     |      |     |    |   |         |  |
| Aar35 | FM878123.1 | TT                             | 6  | 91  | 102 | 377 | 186 | 64.4 |     |    |   |         |  |
|       | Aar35F     | TCGACCAGACCATCTCATTGG          |    |     |     |     |     |      |     |    |   |         |  |
|       | Aar35R     | ACCAAGTGAAAGACTCCAAGTCAGAAAC   |    |     |     |     |     |      |     |    |   |         |  |
| Aar36 | FM878124.1 | TTTC                           | 9  | 329 | 364 | 599 | 385 | 63.4 | Fam | 61 | P | 323-465 |  |
|       | Aar36F     | TTTGCCATTTGGAAGCACAG           |    |     |     |     |     |      |     |    |   |         |  |
|       | Aar36R     | ATGGGCAAGGCAAAGAAAGG           |    |     |     |     |     |      |     |    |   |         |  |
| Aar37 | FM878125.1 | AA                             | 6  | 57  | 68  | 525 | 181 | 64.9 |     |    |   |         |  |
|       | Aar37F     | AAAACCAAATGCTCTCCGAAGG         |    |     |     |     |     |      |     |    |   |         |  |
|       | Aar37R     | CAGAGCACCTTTCTTTGGGCTTT        |    |     |     |     |     |      |     |    |   |         |  |
| Aar38 | FM878126.1 | AA                             | 5  | 67  | 76  | 337 | 250 | 64.3 | Hex | 62 | M | 250     |  |
|       | Aar38F     | TCAAGTCACTCCTTTACATCTCAAAGC    |    |     |     |     |     |      |     |    |   |         |  |
|       | Aar38R     | GTGCCACACAAGCAGCATT            |    |     |     |     |     |      |     |    |   |         |  |
| Aar39 | FM878127.1 | AGAG                           | 9  | 105 | 140 | 533 | 237 | 63.9 | Fam | 62 | P | 216-237 |  |

|       |            |                                  |    |     |     |     |     |      |     |    |   |         |  |
|-------|------------|----------------------------------|----|-----|-----|-----|-----|------|-----|----|---|---------|--|
|       | Aar39F     | AAGCGGATAATAAACAGAGAGCATTG       |    |     |     |     |     |      |     |    |   |         |  |
|       | Aar39R     | GCCAATCCCGAACAGGAAAC             |    |     |     |     |     |      |     |    |   |         |  |
| Aar40 | FM878128.1 | AAGG                             | 19 | 21  | 96  | 451 | NA  | NA   |     |    |   |         |  |
|       | Aar40F     | NA                               |    |     |     |     |     |      |     |    |   |         |  |
|       | Aar40R     | NA                               |    |     |     |     |     |      |     |    |   |         |  |
| Aar41 | FM878129.1 | GATG                             | 20 | 277 | 356 | 360 | NA  | NA   |     |    |   |         |  |
|       | Aar41F     | NA                               |    |     |     |     |     |      |     |    |   |         |  |
|       | Aar41R     | NA                               |    |     |     |     |     |      |     |    |   |         |  |
| Aar42 | FM878130.1 | AAAG                             | 12 | 497 | 544 | 823 | 388 | 63.8 |     |    |   |         |  |
|       | Aar42F     | GAAACCAGATTGTTTGGGTTTATGC        |    |     |     |     |     |      |     |    |   |         |  |
|       | Aar42R     | AACAACCCAGGAGCAGACACTG           |    |     |     |     |     |      |     |    |   |         |  |
| Aar43 | FM878131.1 | GG                               | 5  | 383 | 392 | 496 | 235 | 63.8 |     |    |   |         |  |
|       | Aar43F     | TGAACAGCAACTATGCTTTATATTCCTCTC   |    |     |     |     |     |      |     |    |   |         |  |
|       | Aar43R     | TGGTGATATAATTAATGTCTCTCCATCACTC  |    |     |     |     |     |      |     |    |   |         |  |
| Aar44 | FM878132.1 | ATGA                             | 6  | 113 | 136 | 474 | 190 | 63.5 |     |    |   |         |  |
|       | Aar44F     | CAGTCCAGCTTTGAGCTCCTTG           |    |     |     |     |     |      |     |    |   |         |  |
|       | Aar44R     | TTTCCACCCTGTGGAGTTG              |    |     |     |     |     |      |     |    |   |         |  |
| Aar45 | FM878133.1 | AC                               | 7  | 149 | 162 | 666 | 239 | 65.2 | Fam | 63 | M | 239     |  |
|       | Aar45F     | GGCATTACTGTGCTCCATCCAC           |    |     |     |     |     |      |     |    |   |         |  |
|       | Aar45R     | GGGCAATTCATTTCCATTGGTG           |    |     |     |     |     |      |     |    |   |         |  |
| Aar46 | FM878134.1 | AC                               | 5  | 95  | 104 | 425 | 192 | 63.4 |     |    |   |         |  |
|       | Aar46F     | GGGCCTCAGGAGAACTCCAC             |    |     |     |     |     |      |     |    |   |         |  |
|       | Aar46R     | AATGCTGTTTAGCATTAAACATTGTTGG     |    |     |     |     |     |      |     |    |   |         |  |
| Aar47 | FM878135.1 | TCTC                             | 6  | 173 | 196 | 621 | 292 | 63.5 | Hex | 62 | P | 290-304 |  |
|       | Aar47F     | CTGTGGAGGCAGAGGGGAAGAG           |    |     |     |     |     |      |     |    |   |         |  |
|       | Aar47R     | GGAAATGAACTGAGGATTTACACACAG      |    |     |     |     |     |      |     |    |   |         |  |
| Aar48 | FM878136.1 | ATCA                             | 5  | 177 | 196 | 388 | 229 | 65.0 |     |    |   |         |  |
|       | Aar48F     | TGTCATTATGAGCTTGTATAGAAAGGATATGG |    |     |     |     |     |      |     |    |   |         |  |
|       | Aar48R     | TGTGAGCAATTCTTCTTGAATTGG         |    |     |     |     |     |      |     |    |   |         |  |
| Aar49 | FM878137.1 | TCTT                             | 29 | 61  | 205 | 513 | NA  | NA   |     |    |   |         |  |
|       | Aar49F     | NA                               |    |     |     |     |     |      |     |    |   |         |  |
|       | Aar49R     | NA                               |    |     |     |     |     |      |     |    |   |         |  |
| Aar50 | FM878138.1 | GTGT                             | 5  | 161 | 180 | 445 | 202 | 63.3 |     |    |   |         |  |
|       | Aar50F     | GTGTGATTTGAGGAAGGGAGAAGG         |    |     |     |     |     |      |     |    |   |         |  |
|       | Aar50R     | AATCCCACAGGTGATTGTTGG            |    |     |     |     |     |      |     |    |   |         |  |
| Aar51 | FM878139.1 | TCTT                             | 29 | 97  | 212 | 453 | 394 | 64.4 |     |    |   |         |  |
|       | Aar51F     | GCAGTTCTCTCCATGGTATTTGC          |    |     |     |     |     |      |     |    |   |         |  |
|       | Aar51R     | AAATCACCAGTGTGGGCATCC            |    |     |     |     |     |      |     |    |   |         |  |
| Aar52 | FM878140.1 | TTCT                             | 11 | 89  | 132 | 285 | NA  | NA   |     |    |   |         |  |
|       | Aar52F     | NA                               |    |     |     |     |     |      |     |    |   |         |  |
|       | Aar52R     | NA                               |    |     |     |     |     |      |     |    |   |         |  |
| Aar53 | FM878141.1 | AA                               | 5  | 353 | 362 | 538 | 457 | 64.9 |     |    |   |         |  |
|       | Aar53F     | AGGTTGGACCTTCCCAGTTTCAG          |    |     |     |     |     |      |     |    |   |         |  |
|       | Aar53R     | GATCCACAGGATTTGGGAAAGATG         |    |     |     |     |     |      |     |    |   |         |  |
| Aar54 | FM878142.1 | AAGAA                            | 8  | 251 | 290 | 440 | 290 | 62.0 |     |    |   |         |  |
|       | Aar54F     | TGCTGAGCAAAATTAAGCCTTC           |    |     |     |     |     |      |     |    |   |         |  |
|       | Aar54R     | TCGTGTTCACTTTTGGATATATTCTCC      |    |     |     |     |     |      |     |    |   |         |  |
| Aar55 | FM878143.1 | TTTC                             | 7  | 41  | 68  | 237 | NA  | NA   |     |    |   |         |  |
|       | Aar55F     | NA                               |    |     |     |     |     |      |     |    |   |         |  |
|       | Aar55R     | NA                               |    |     |     |     |     |      |     |    |   |         |  |

|       |            |                                    |    |     |     |     |     |      |     |    |   |         |  |
|-------|------------|------------------------------------|----|-----|-----|-----|-----|------|-----|----|---|---------|--|
| Aar56 | FM878144.1 | ATTT                               | 6  | 177 | 200 | 392 | 235 | 63.2 |     |    |   |         |  |
|       | Aar56F     | GGGAACCTGGTGGTACTTTGAGG            |    |     |     |     |     |      |     |    |   |         |  |
|       | Aar56R     | ACCAATGAGTGTTAACAGGTAAGAGAGAAG     |    |     |     |     |     |      |     |    |   |         |  |
| Aar57 | FM878145.1 | TATC                               | 16 | 77  | 140 | 575 | 292 | 60.5 | Fam | 58 | P | 250-297 |  |
|       | Aar57F     | TCTGGTGTAACGTCTTATTGATT            |    |     |     |     |     |      |     |    |   |         |  |
|       | Aar57R     | CCATCTCATCACATCTGTCACAC            |    |     |     |     |     |      |     |    |   |         |  |
| Aar58 | FM878146.1 | CAA                                | 6  | 46  | 63  | 429 | 165 | 60.4 | Fam | 58 | P | 150-165 |  |
|       | Aar58F     | TCGGTAACCAAAACCCAAAA               |    |     |     |     |     |      |     |    |   |         |  |
|       | Aar58R     | TTAGAAAGGGCATCCCTGAG               |    |     |     |     |     |      |     |    |   |         |  |
| Aar59 | FM878147.1 | TATC                               | 13 | 477 | 528 | 714 | 283 | 65.4 | Fam | 63 | P | 274-283 |  |
|       | Aar59F     | TCCCTAGATGCTTCTGCTTCTTCTG          |    |     |     |     |     |      |     |    |   |         |  |
|       | Aar59R     | TGAAGGTTGCACATCCACAGG              |    |     |     |     |     |      |     |    |   |         |  |
| Aar60 | FM878148.1 | TCTC                               | 7  | 341 | 368 | 381 | NA  | NA   |     |    |   |         |  |
|       | Aar60F     | NA                                 |    |     |     |     |     |      |     |    |   |         |  |
|       | Aar60R     | NA                                 |    |     |     |     |     |      |     |    |   |         |  |
| Aar61 | FM878149.1 | TTTC                               | 21 | 129 | 212 | 365 | 331 | 63.8 |     |    |   |         |  |
|       | Aar61F     | CCTCACCATAAATGTATCCAGTCACC         |    |     |     |     |     |      |     |    |   |         |  |
|       | Aar61R     | TTTGGAGGACATAGAAATGTCTTAAAGATG     |    |     |     |     |     |      |     |    |   |         |  |
| Aar62 | FM878150.1 | TT                                 | 7  | 69  | 82  | 254 | 159 | 66.7 | Fam | 65 | P | 158-163 |  |
|       | Aar62F     | CATGGTCCCTCCAACCCAAAC              |    |     |     |     |     |      |     |    |   |         |  |
|       | Aar62R     | AAGGCAGCCAGGAATATAAATATGAAATC      |    |     |     |     |     |      |     |    |   |         |  |
| Aar63 | FM878151.1 | GA                                 | 8  | 381 | 396 | 620 | 372 | 63.9 |     |    |   |         |  |
|       | Aar63F     | AAGTGAGCACTCAGTGGATTGTGAC          |    |     |     |     |     |      |     |    |   |         |  |
|       | Aar63R     | CTGTTCTGACACTCTTCTGTCC             |    |     |     |     |     |      |     |    |   |         |  |
| Aar64 | FM878152.1 | TAGGA                              | 34 | 141 | 310 | 396 | 341 | 61.2 |     |    |   |         |  |
|       | Aar64F     | TTGGTTGCAATTTCCAAGAAC              |    |     |     |     |     |      |     |    |   |         |  |
|       | Aar64R     | GATCAGTCCTGAAGTAGTCAGGTTGT         |    |     |     |     |     |      |     |    |   |         |  |
| Aar65 | FM878153.1 | TA                                 | 5  | 93  | 102 | 635 | 216 | 62.2 | Fam | 60 | P | 216-224 |  |
|       | Aar65F     | TCAGTAGATGAAATAATTTACCTTTGTAGAATTT |    |     |     |     |     |      |     |    |   |         |  |
|       | Aar65R     | CTTGGCGAATCCAGTTCACA               |    |     |     |     |     |      |     |    |   |         |  |
| Aar66 | FM878154.1 | AATAG                              | 28 | 41  | 180 | 399 | NA  | NA   |     |    |   |         |  |
|       | Aar66F     | NA                                 |    |     |     |     |     |      |     |    |   |         |  |
|       | Aar66R     | NA                                 |    |     |     |     |     |      |     |    |   |         |  |
| Aar67 | FM878155.1 | TAGAA                              | 39 | 186 | 380 | 526 | NA  | NA   |     |    |   |         |  |
|       | Aar67F     | NA                                 |    |     |     |     |     |      |     |    |   |         |  |
|       | Aar67R     | NA                                 |    |     |     |     |     |      |     |    |   |         |  |
| Aar68 | FM878156.1 | CTAT                               | 11 | 285 | 328 | 387 | 249 | 61.1 |     |    |   |         |  |
|       | Aar68F     | CGGGCATGAGGAAAGTAAT                |    |     |     |     |     |      |     |    |   |         |  |
|       | Aar68R     | ACCAAATTATTCTATGAACCCAAA           |    |     |     |     |     |      |     |    |   |         |  |
| Aar69 | FM878157.1 | ATCA                               | 8  | 121 | 152 | 449 | 219 | 64.5 |     |    |   |         |  |
|       | Aar69F     | TACTGTGCTGTTAAGAGAATAAACAATAAATGG  |    |     |     |     |     |      |     |    |   |         |  |
|       | Aar69R     | GGAAGCACCCAAAGAGCTCAAG             |    |     |     |     |     |      |     |    |   |         |  |
| Aar70 | FM878158.1 | CA                                 | 6  | 299 | 310 | 663 | 268 | 63.4 | Hex | 61 | M | 268     |  |
|       | Aar70F     | GGTTGGTGAATAATGGCTGTGG             |    |     |     |     |     |      |     |    |   |         |  |
|       | Aar70R     | CAGTCACAATGCAACTGATAACAACCTC       |    |     |     |     |     |      |     |    |   |         |  |
| Aar71 | FM878159.1 | AA                                 | 5  | 35  | 44  | 749 | NA  | NA   |     |    |   |         |  |
|       | Aar71F     | NA                                 |    |     |     |     |     |      |     |    |   |         |  |
|       | Aar71R     | NA                                 |    |     |     |     |     |      |     |    |   |         |  |
| Aar72 | FM878160.1 | AAAGA                              | 27 | 66  | 200 | 584 | 495 | 64.8 |     |    |   |         |  |
|       | Aar72F     | CACACCACAGCAAAATCAAGTGC            |    |     |     |     |     |      |     |    |   |         |  |
|       | Aar72R     | CAGACCGGGTACTTATTCTGTCCCTA         |    |     |     |     |     |      |     |    |   |         |  |
| Aar73 | FM878161.1 | AGAA                               | 39 | 37  | 192 | 751 | NA  | NA   |     |    |   |         |  |

|       |            |                                |    |     |     |     |     |      |     |    |    |  |  |  |  |  |  |  |  |         |  |
|-------|------------|--------------------------------|----|-----|-----|-----|-----|------|-----|----|----|--|--|--|--|--|--|--|--|---------|--|
|       | Aar73F     | NA                             |    |     |     |     |     |      |     |    |    |  |  |  |  |  |  |  |  |         |  |
|       | Aar73R     | NA                             |    |     |     |     |     |      |     |    |    |  |  |  |  |  |  |  |  |         |  |
| Aar74 | FM878162.1 | AGAA                           | 5  | 221 | 240 | 438 | 284 | 62.9 |     |    |    |  |  |  |  |  |  |  |  |         |  |
|       | Aar74F     | AGATTTGTAGCTATTGTATCACAGGCATC  |    |     |     |     |     |      |     |    |    |  |  |  |  |  |  |  |  |         |  |
|       | Aar74R     | CCCTCCTTCTCCTCGTAAGC           |    |     |     |     |     |      |     |    |    |  |  |  |  |  |  |  |  |         |  |
| Aar75 | FM878163.1 | TGTG                           | 7  | 257 | 284 | 450 | 270 | 65.8 |     |    |    |  |  |  |  |  |  |  |  |         |  |
|       | Aar75F     | AGGCTCTCCTTTACAGTCCATATTTCC    |    |     |     |     |     |      |     |    |    |  |  |  |  |  |  |  |  |         |  |
|       | Aar75R     | GGGTGGTAAATGGGTAAATGGGTATG     |    |     |     |     |     |      |     |    |    |  |  |  |  |  |  |  |  |         |  |
| Aar76 | FM878164.1 | TGAT                           | 6  | 449 | 472 | 529 | 245 | 64.7 |     |    |    |  |  |  |  |  |  |  |  |         |  |
|       | Aar76F     | TGAAACCCTTGCTGACCTTGG          |    |     |     |     |     |      |     |    |    |  |  |  |  |  |  |  |  |         |  |
|       | Aar76R     | TTCCAGCCTGCACAACCTTTCC         |    |     |     |     |     |      |     |    |    |  |  |  |  |  |  |  |  |         |  |
| Aar77 | FM878165.1 | TT                             | 7  | 231 | 244 | 715 | 282 | 63.9 |     |    |    |  |  |  |  |  |  |  |  |         |  |
|       | Aar77F     | ACCAGAACTTTCCGTCATTGAATC       |    |     |     |     |     |      |     |    |    |  |  |  |  |  |  |  |  |         |  |
|       | Aar77R     | GCCAGCCTTTAACCATTGAG           |    |     |     |     |     |      |     |    |    |  |  |  |  |  |  |  |  |         |  |
| Aar78 | FM878166.1 | AAAG                           | 12 | 181 | 228 | 472 | 376 | 63.6 | Hex | 62 | P  |  |  |  |  |  |  |  |  | 280-376 |  |
|       | Aar78F     | TTGCTTTCTGCTTCCTTAGATGGAT      |    |     |     |     |     |      |     |    |    |  |  |  |  |  |  |  |  |         |  |
|       | Aar78R     | CCAAATTTGACATTCTTGCAATTTCT     |    |     |     |     |     |      |     |    |    |  |  |  |  |  |  |  |  |         |  |
| Aar79 | FM878167.1 | AC                             | 9  | 265 | 282 | 573 | 246 | 63.5 |     |    |    |  |  |  |  |  |  |  |  |         |  |
|       | Aar79F     | ACCTTCAGAAACCCATCATGTCC        |    |     |     |     |     |      |     |    |    |  |  |  |  |  |  |  |  |         |  |
|       | Aar79R     | GCCACTCTAGCAAATCTGTTACCAC      |    |     |     |     |     |      |     |    |    |  |  |  |  |  |  |  |  |         |  |
| Aar80 | FM878168.1 | AAAG                           | 13 | 369 | 420 | 689 | 580 | 64.9 |     |    |    |  |  |  |  |  |  |  |  |         |  |
|       | Aar80F     | TGCAGGGAACAACAATAACAACAAC      |    |     |     |     |     |      |     |    |    |  |  |  |  |  |  |  |  |         |  |
|       | Aar80R     | AAATCAGCCCTGCTGTTGTGG          |    |     |     |     |     |      |     |    |    |  |  |  |  |  |  |  |  |         |  |
| Aar81 | FM878169.1 | AGAG                           | 5  | 289 | 308 | 520 | 386 | 64.5 | Hex | 62 | P  |  |  |  |  |  |  |  |  | 348-386 |  |
|       | Aar81F     | TCCATGGGAGGCAGTGTCTG           |    |     |     |     |     |      |     |    |    |  |  |  |  |  |  |  |  |         |  |
|       | Aar81R     | AACTGAGCACACATTCAGAACAGAGAG    |    |     |     |     |     |      |     |    |    |  |  |  |  |  |  |  |  |         |  |
| Aar82 | FM878170.1 | GAAAG                          | 36 | 96  | 275 | 510 | 500 | 63.3 |     |    |    |  |  |  |  |  |  |  |  |         |  |
|       | Aar82F     | CCAGGGCTGGAACCTTGG             |    |     |     |     |     |      |     |    |    |  |  |  |  |  |  |  |  |         |  |
|       | Aar82R     | TTGCCCTGAAAGGAAGGATTG          |    |     |     |     |     |      |     |    |    |  |  |  |  |  |  |  |  |         |  |
| Aar83 | FM878171.1 | CTAT                           | 5  | 117 | 136 | 390 | 288 | 64.4 |     |    |    |  |  |  |  |  |  |  |  |         |  |
|       | Aar83F     | GGTATCAGATTGTGGAAGGTGAAGC      |    |     |     |     |     |      |     |    |    |  |  |  |  |  |  |  |  |         |  |
|       | Aar83R     | ATGGCAACCTGTGCAGCATC           |    |     |     |     |     |      |     |    |    |  |  |  |  |  |  |  |  |         |  |
| Aar84 | FM878172.1 | AA                             | 5  | 287 | 296 | 628 | 375 | 66.2 | Fam | 64 | P  |  |  |  |  |  |  |  |  | 356-456 |  |
|       | Aar84F     | TGGCACTCTCAGTGTGGCTTTG         |    |     |     |     |     |      |     |    |    |  |  |  |  |  |  |  |  |         |  |
|       | Aar84R     | GCTAGCAGGGCTGCACATGG           |    |     |     |     |     |      |     |    |    |  |  |  |  |  |  |  |  |         |  |
| Aar85 | FM878173.1 | TCTT                           | 24 | 249 | 344 | 435 | 288 | 60.5 |     |    |    |  |  |  |  |  |  |  |  |         |  |
|       | Aar85F     | CAAGAGCATGAAGCTGGAGAA          |    |     |     |     |     |      |     |    |    |  |  |  |  |  |  |  |  |         |  |
|       | Aar85R     | TCAGCAATTTCTTATTCTAAAATCCTCT   |    |     |     |     |     |      |     |    |    |  |  |  |  |  |  |  |  |         |  |
| Aar86 | FM878174.1 | TCTA                           | 6  | 113 | 136 | 582 | 278 | 64.9 | Hex | 63 | P  |  |  |  |  |  |  |  |  | 278-302 |  |
|       | Aar86F     | GTGAGCTCCAGGAAGGCACTG          |    |     |     |     |     |      |     |    |    |  |  |  |  |  |  |  |  |         |  |
|       | Aar86R     | TCTAGTAGGAAGCCTGAATGACCACTG    |    |     |     |     |     |      |     |    |    |  |  |  |  |  |  |  |  |         |  |
| Aar87 | FM878175.1 | TT                             | 5  | 51  | 60  | 387 | 233 | 63.8 |     |    |    |  |  |  |  |  |  |  |  |         |  |
|       | Aar87F     | TTCTGTAGAGTCATCTCTCTGTACCTG    |    |     |     |     |     |      |     |    |    |  |  |  |  |  |  |  |  |         |  |
|       | Aar87R     | GCAGATTTAATTGCAGATAATGAAGTATGG |    |     |     |     |     |      |     |    |    |  |  |  |  |  |  |  |  |         |  |
| Aar88 | FM878176.1 | AGCT                           | 9  | 241 | 276 | 711 | 395 | 64.2 |     |    |    |  |  |  |  |  |  |  |  |         |  |
|       | Aar88F     | GCTTAGCCAATCAAGGGACACC         |    |     |     |     |     |      |     |    |    |  |  |  |  |  |  |  |  |         |  |
|       | Aar88R     | GCAGGGTCTAGGAAAGCCAATG         |    |     |     |     |     |      |     |    |    |  |  |  |  |  |  |  |  |         |  |
| Aar89 | FM878177.1 | AC                             | 6  | 89  | 100 | 565 | 237 | 63.7 |     |    |    |  |  |  |  |  |  |  |  |         |  |
|       | Aar89F     | GGAAATATTCCGCTGACACATCC        |    |     |     |     |     |      |     |    |    |  |  |  |  |  |  |  |  |         |  |
|       | Aar89R     | TGGCTCTAAATCAATCAATCAATCATC    |    |     |     |     |     |      |     |    |    |  |  |  |  |  |  |  |  |         |  |
| Aar90 | FM878178.1 | AA                             | 5  | 555 | 564 | 604 | 182 | 63.9 | Fam | 62 | NA |  |  |  |  |  |  |  |  |         |  |
|       | Aar90F     | GGTGGCTTCAACCTTTGTTGC          |    |     |     |     |     |      |     |    |    |  |  |  |  |  |  |  |  |         |  |
|       | Aar90R     | CGCTCTGGAGCTGTGCTTTC           |    |     |     |     |     |      |     |    |    |  |  |  |  |  |  |  |  |         |  |
| Aar91 | FM878179.1 | TTTC                           | 36 | 429 | 572 | 640 | NA  | NA   |     |    |    |  |  |  |  |  |  |  |  |         |  |
|       | Aar91F     | NA                             |    |     |     |     |     |      |     |    |    |  |  |  |  |  |  |  |  |         |  |
|       | Aar91R     | NA                             |    |     |     |     |     |      |     |    |    |  |  |  |  |  |  |  |  |         |  |
| Aar92 | FM878180.1 | AAGG                           | 22 | 141 | 228 | 359 | 278 | 64.3 |     |    |    |  |  |  |  |  |  |  |  |         |  |
|       | Aar92F     | CAGCATGATACATGGCTCAGAGG        |    |     |     |     |     |      |     |    |    |  |  |  |  |  |  |  |  |         |  |
|       | Aar92R     | TGCCCTACCCTTCATGGTTG           |    |     |     |     |     |      |     |    |    |  |  |  |  |  |  |  |  |         |  |

|        |            |                                     |    |     |     |     |     |      |     |    |   |         |
|--------|------------|-------------------------------------|----|-----|-----|-----|-----|------|-----|----|---|---------|
| Aar93  | FM878181.1 | CTTT                                | 9  | 197 | 232 | 521 | 417 | 63.6 |     |    |   |         |
|        | Aar93F     | TCATCAACAACTTTGGCTCTGG              |    |     |     |     |     |      |     |    |   |         |
|        | Aar93R     | GGCAAGAAAGAGCGCAAGAAG               |    |     |     |     |     |      |     |    |   |         |
| Aar94  | FM878182.1 | TG                                  | 8  | 343 | 358 | 584 | 344 | 63.9 |     |    |   |         |
|        | Aar94F     | AGCTGAATTAGTTCCCACACATCATC          |    |     |     |     |     |      |     |    |   |         |
|        | Aar94R     | CCAAGCAGAATGTGTGAAACAGG             |    |     |     |     |     |      |     |    |   |         |
| Aar95  | FM878183.1 | AGAG                                | 7  | 401 | 428 | 443 | NA  | NA   |     |    |   |         |
|        | Aar95F     | NA                                  |    |     |     |     |     |      |     |    |   |         |
|        | Aar95R     | NA                                  |    |     |     |     |     |      |     |    |   |         |
| Aar96  | FM878184.1 | AACA                                | 6  | 181 | 204 | 387 | 225 | 63.4 |     |    |   |         |
|        | Aar96F     | AGTGAGATTGAAGAAATGTCCACAGAC         |    |     |     |     |     |      |     |    |   |         |
|        | Aar96R     | TGACACGTGAAGAGGTTTCATTCC            |    |     |     |     |     |      |     |    |   |         |
| Aar97  | FM878185.1 | GA                                  | 5  | 703 | 712 | 720 | NA  | NA   |     |    |   |         |
|        | Aar97F     | NA                                  |    |     |     |     |     |      |     |    |   |         |
|        | Aar97R     | NA                                  |    |     |     |     |     |      |     |    |   |         |
| Aar98  | FM878186.1 | GGAA                                | 30 | 113 | 232 | 395 | 328 | 64.4 |     |    |   |         |
|        | Aar98F     | CTTTCAAAACTATGGTATATGATTCCAAGAAA    |    |     |     |     |     |      |     |    |   |         |
|        | Aar98R     | TGCCTTTTCATTCCCTCCATTCC             |    |     |     |     |     |      |     |    |   |         |
| Aar99  | FM878187.1 | TATC                                | 14 | 105 | 160 | 371 | 295 | 64.7 |     |    |   |         |
|        | Aar99F     | GGGCTTTCAGAGGTGGAGACC               |    |     |     |     |     |      |     |    |   |         |
|        | Aar99R     | TGTCTGAGGAAATGCTTCCACTAC            |    |     |     |     |     |      |     |    |   |         |
| Aar100 | FM878188.1 | GA                                  | 5  | 193 | 202 | 437 | 329 | 63.7 |     |    |   |         |
|        | Aar100F    | CGGAAGTGCTTTGAGGAACTAAGTC           |    |     |     |     |     |      |     |    |   |         |
|        | Aar100R    | TCACTTCAAAGCCTAAATCAAAGG            |    |     |     |     |     |      |     |    |   |         |
| Aar101 | FM878189.1 | GAAA                                | 24 | 161 | 256 | 451 | 384 | 64.4 |     |    |   |         |
|        | Aar101F    | CTCACCAGGTTAGAGAAACGGAATG           |    |     |     |     |     |      |     |    |   |         |
|        | Aar101R    | CCTTTCAGTGTGTTACCAGCTTC             |    |     |     |     |     |      |     |    |   |         |
| Aar102 | FM878190.1 | TTCTC                               | 25 | 26  | 150 | 304 | NA  | NA   |     |    |   |         |
|        | Aar102F    | NA                                  |    |     |     |     |     |      |     |    |   |         |
|        | Aar102R    | NA                                  |    |     |     |     |     |      |     |    |   |         |
| Aar103 | FM878191.1 | ATAG                                | 9  | 421 | 456 | 529 | 196 | 63.7 | Hex | 62 | P | 190-196 |
|        | Aar103F    | CGAGCCTTACTCAGAACATCTGC             |    |     |     |     |     |      |     |    |   |         |
|        | Aar103R    | CATCATCATCATCCCTCCAAGTG             |    |     |     |     |     |      |     |    |   |         |
| Aar104 | FM878192.1 | TCT                                 | 5  | 151 | 165 | 574 | 563 | 63.1 |     |    |   |         |
|        | Aar104F    | GGCAGAGCCAAACACTTTGC                |    |     |     |     |     |      |     |    |   |         |
|        | Aar104R    | AGGCATCAGACATTGATTAATAATAAAGAAG     |    |     |     |     |     |      |     |    |   |         |
| Aar105 | FM878193.1 | GAAA                                | 42 | 505 | 672 | 742 | 398 | 61.0 |     |    |   |         |
|        | Aar105F    | CCCAGCTACTTAATTGGGTTCC              |    |     |     |     |     |      |     |    |   |         |
|        | Aar105R    | GAACCATTGTCACACTTCTGG               |    |     |     |     |     |      |     |    |   |         |
| Aar106 | FM878194.1 | TCTA                                | 7  | 269 | 296 | 533 | 495 | 65.2 |     |    |   |         |
|        | Aar106F    | GCTATTTCTTCTGTTCTAGCAATTGATACCC     |    |     |     |     |     |      |     |    |   |         |
|        | Aar106R    | AACAATTCTAACAAGGAACTGCCATAACC       |    |     |     |     |     |      |     |    |   |         |
| Aar107 | FM878195.1 | ACAC                                | 5  | 221 | 240 | 348 | 198 | 62.3 |     |    |   |         |
|        | Aar107F    | TCAATCTCCCAGGCTGCAC                 |    |     |     |     |     |      |     |    |   |         |
|        | Aar107R    | TTTACCTTAAGTTTCTATTTAACTCTACTGACAGG |    |     |     |     |     |      |     |    |   |         |
| Aar108 | FM878196.1 | CTTT                                | 16 | 57  | 120 | 332 | 317 | 61.6 |     |    |   |         |
|        | Aar108F    | TCGTGGGCCTTAACAACCTTAAC             |    |     |     |     |     |      |     |    |   |         |
|        | Aar108R    | AGTGCCACACCTACAATGTATTC             |    |     |     |     |     |      |     |    |   |         |
| Aar109 | FM878197.1 | TAGA                                | 13 | 521 | 572 | 714 | 294 | 63.5 |     |    |   |         |
|        | Aar109F    | TTGCTGCTGTGGTTACTGTCAAATAC          |    |     |     |     |     |      |     |    |   |         |
|        | Aar109R    | TCCTGGGACAAGAATCCCAAC               |    |     |     |     |     |      |     |    |   |         |
| Aar110 | FM878198.1 | TAGA                                | 13 | 281 | 332 | 342 | NA  | NA   |     |    |   |         |
|        | Aar110F    | NA                                  |    |     |     |     |     |      |     |    |   |         |
|        | Aar110R    | NA                                  |    |     |     |     |     |      |     |    |   |         |
| Aar111 | FM878199.1 | TG                                  | 5  | 285 | 294 | 638 | 360 | 64.7 | Hex | 63 | P | 360-373 |
|        | Aar111F    | TCAATTGGGAAGGTGGAGCAC               |    |     |     |     |     |      |     |    |   |         |
|        | Aar111R    | CCACAGCTGGAATTCCTCTCTCTC            |    |     |     |     |     |      |     |    |   |         |
| Aar112 | FM878200.1 | TG                                  | 8  | 79  | 94  | 740 | 237 | 64.3 |     |    |   |         |
|        | Aar112F    | TCTGGACTGTAGACAACAAATCTCTGAAG       |    |     |     |     |     |      |     |    |   |         |

|        |            |                                     |    |     |     |     |     |      |     |    |   |         |  |
|--------|------------|-------------------------------------|----|-----|-----|-----|-----|------|-----|----|---|---------|--|
|        | Aar112R    | AATCCGAGTAACCCAGAAATATGCAC          |    |     |     |     |     |      |     |    |   |         |  |
| Aar113 | FM878201.1 | TCTA                                | 10 | 565 | 604 | 657 | 232 | 60.6 |     |    |   |         |  |
|        | Aar113F    | TGCTTGTGTTTGCTTCCGTA                |    |     |     |     |     |      |     |    |   |         |  |
|        | Aar113R    | GATCAGGGAGTTTCATGGATAATAAA          |    |     |     |     |     |      |     |    |   |         |  |
| Aar114 | FM878202.1 | TGAT                                | 6  | 401 | 424 | 534 | 191 | 63.1 |     |    |   |         |  |
|        | Aar114F    | GACAGGTGTCATGAACAAATTCCTC           |    |     |     |     |     |      |     |    |   |         |  |
|        | Aar114R    | AATAACTGCCTAATTGAACTAGCACTGG        |    |     |     |     |     |      |     |    |   |         |  |
| Aar115 | FM878203.1 | GATA                                | 13 | 45  | 96  | 310 | 262 | 63.4 |     |    |   |         |  |
|        | Aar115F    | ACAGAAGCCTTCAGCAGTGGAG              |    |     |     |     |     |      |     |    |   |         |  |
|        | Aar115R    | TTTAATATCCAAATAGTTACCTGGAGAATGATAAC |    |     |     |     |     |      |     |    |   |         |  |
| Aar116 | FM878204.1 | TTCT                                | 24 | 241 | 336 | 649 | 473 | 65.0 |     |    |   |         |  |
|        | Aar116F    | ACGTTGGATGAGTTTGAAGAGATGC           |    |     |     |     |     |      |     |    |   |         |  |
|        | Aar116R    | TCTGCAGTCAGGGAACAAGGAAG             |    |     |     |     |     |      |     |    |   |         |  |
| Aar117 | FM878205.1 | TCTT                                | 6  | 281 | 304 | 561 | 395 | 64.0 |     |    |   |         |  |
|        | Aar117F    | TGGGAATTTCTTTAAGCCAGAAGC            |    |     |     |     |     |      |     |    |   |         |  |
|        | Aar117R    | CCAGACTGAAATTAATCAGTGGTTCTTATG      |    |     |     |     |     |      |     |    |   |         |  |
| Aar118 | FM878206.1 | AGGA                                | 27 | 85  | 192 | 500 | 483 | 64.3 |     |    |   |         |  |
|        | Aar118F    | AGCACATGGCAGTGGGATTG                |    |     |     |     |     |      |     |    |   |         |  |
|        | Aar118R    | CATGTGAGCTGGGGCTGAAG                |    |     |     |     |     |      |     |    |   |         |  |
| Aar119 | FM878207.1 | CT                                  | 6  | 39  | 50  | 511 | 150 | 64.8 | Fam | 63 | P | 150-155 |  |
|        | Aar119F    | TTCCATGTGCTGGTCTGAAG                |    |     |     |     |     |      |     |    |   |         |  |
|        | Aar119R    | AATCAGGGCCTGCCAGAGG                 |    |     |     |     |     |      |     |    |   |         |  |
| Aar120 | FM878208.1 | CTTT                                | 24 | 193 | 288 | 473 | NA  | NA   |     |    |   |         |  |
|        | Aar120F    | NA                                  |    |     |     |     |     |      |     |    |   |         |  |
|        | Aar120R    | NA                                  |    |     |     |     |     |      |     |    |   |         |  |
| Aar121 | FM878209.1 | GAGA                                | 6  | 149 | 172 | 528 | 224 | 64.7 |     |    |   |         |  |
|        | Aar121F    | GAGGCCTAGCTGAAGGGAAAGC              |    |     |     |     |     |      |     |    |   |         |  |
|        | Aar121R    | TGTTTGCTTGCTCTGGAATGATG             |    |     |     |     |     |      |     |    |   |         |  |
| Aar122 | FM878210.1 | GAAGA                               | 6  | 86  | 115 | 354 | NA  | NA   |     |    |   |         |  |
|        | Aar122F    | NA                                  |    |     |     |     |     |      |     |    |   |         |  |
|        | Aar122R    | NA                                  |    |     |     |     |     |      |     |    |   |         |  |
| Aar123 | FM878211.1 | TTTCT                               | 40 | 171 | 370 | 601 | 493 | 65.4 |     |    |   |         |  |
|        | Aar123F    | GCCTTGTAGCCTCAACTAAGGAAGC           |    |     |     |     |     |      |     |    |   |         |  |
|        | Aar123R    | TTGGCAATAAGCAGCCAGTAACATTAG         |    |     |     |     |     |      |     |    |   |         |  |
| Aar124 | FM878212.1 | AA                                  | 5  | 317 | 326 | 643 | 273 | 63.3 | Fam | 61 | P | 160-273 |  |
|        | Aar124F    | GTGTATCAGTGGTCGTCTGTGTCC            |    |     |     |     |     |      |     |    |   |         |  |
|        | Aar124R    | GCAATGGAGCTGCCTCTCTG                |    |     |     |     |     |      |     |    |   |         |  |
| Aar125 | FM878213.1 | TCTA                                | 7  | 437 | 464 | 498 | NA  | NA   |     |    |   |         |  |
|        | Aar125F    | NA                                  |    |     |     |     |     |      |     |    |   |         |  |
|        | Aar125R    | NA                                  |    |     |     |     |     |      |     |    |   |         |  |
| Aar126 | FM878214.1 | AAGA                                | 7  | 253 | 280 | 376 | 154 | 60.7 |     |    |   |         |  |
|        | Aar126F    | GTCTCCTCTCCTTGGGTTCAA               |    |     |     |     |     |      |     |    |   |         |  |
|        | Aar126R    | CTGAATACTCATGTGAAAGTCATGAAA         |    |     |     |     |     |      |     |    |   |         |  |
| Aar127 | FM878215.1 | TATT                                | 6  | 285 | 308 | 540 | 361 | 65.0 |     |    |   |         |  |
|        | Aar127F    | TGCCTTTGCCTCTTAATCACTGAAG           |    |     |     |     |     |      |     |    |   |         |  |
|        | Aar127R    | GCCATATGAGACTGCTGCATGG              |    |     |     |     |     |      |     |    |   |         |  |
| Aar128 | FM878216.1 | TA                                  | 7  | 317 | 330 | 646 | 247 | 65.5 |     |    |   |         |  |
|        | Aar128F    | TGCCAACCCACACCATTCTG                |    |     |     |     |     |      |     |    |   |         |  |
|        | Aar128R    | CCACAACCTGAATTCATAGGCAACG           |    |     |     |     |     |      |     |    |   |         |  |
| Aar129 | FM878217.1 | TCTT                                | 36 | 389 | 532 | 618 | 305 | 60.3 |     |    |   |         |  |
|        | Aar129F    | GGAGTTCTGGGATGCTATGGT               |    |     |     |     |     |      |     |    |   |         |  |
|        | Aar129R    | GATCCAAGATAAATCGTCTTAGAATAGACT      |    |     |     |     |     |      |     |    |   |         |  |
| Aar130 | FM878218.1 | GAAG                                | 18 | 49  | 120 | 533 | NA  | NA   |     |    |   |         |  |
|        | Aar130F    | NA                                  |    |     |     |     |     |      |     |    |   |         |  |
|        | Aar130R    | NA                                  |    |     |     |     |     |      |     |    |   |         |  |
| Aar131 | FM878219.1 | AGAAA                               | 21 | 76  | 180 | 544 | 437 | 61.2 |     |    |   |         |  |
|        | Aar131F    | TTGTGTACAATTAATGTAGTCAGACAATCTC     |    |     |     |     |     |      |     |    |   |         |  |
|        | Aar131R    | TGCTCTGCCATGTTTGATTC                |    |     |     |     |     |      |     |    |   |         |  |
| Aar132 | FM878220.1 | ACAC                                | 8  | 389 | 420 | 472 | 227 | 64.6 | Fam | 63 | P | 220-227 |  |

|        |            |                                   |    |     |     |     |     |      |     |    |   |         |  |  |
|--------|------------|-----------------------------------|----|-----|-----|-----|-----|------|-----|----|---|---------|--|--|
|        | Aar132F    | GGAGAAGCTTGTTATCCCAAACCA          |    |     |     |     |     |      |     |    |   |         |  |  |
|        | Aar132R    | TGAGGATAGACTTAATTAAGTTGGAGTATTGG  |    |     |     |     |     |      |     |    |   |         |  |  |
| Aar133 | FM878221.1 | AC                                | 5  | 361 | 370 | 562 | 279 | 63.5 |     |    |   |         |  |  |
|        | Aar133F    | AGAATGCCATTTGGTAGAAATCAATG        |    |     |     |     |     |      |     |    |   |         |  |  |
|        | Aar133R    | CTCCACTACAACAGAGAGGCCGTATTC       |    |     |     |     |     |      |     |    |   |         |  |  |
| Aar134 | FM878222.1 | TC                                | 5  | 689 | 698 | 739 | 195 | 64.4 |     |    |   |         |  |  |
|        | Aar134F    | TTCTCGGAACCTTCTGCACCTCTC          |    |     |     |     |     |      |     |    |   |         |  |  |
|        | Aar134R    | TTTATGCTGCCAGCCACAGG              |    |     |     |     |     |      |     |    |   |         |  |  |
| Aar135 | FM878223.1 | CA                                | 7  | 195 | 208 | 488 | 162 | 62.2 |     |    |   |         |  |  |
|        | Aar135F    | GGGACTATGTGGGCTGGGTA              |    |     |     |     |     |      |     |    |   |         |  |  |
|        | Aar135R    | TTTGTTTCTTCTCTTTCAAATGAGAC        |    |     |     |     |     |      |     |    |   |         |  |  |
| Aar136 | FM878224.1 | TG                                | 7  | 693 | 706 | 764 | 180 | 63.6 |     |    |   |         |  |  |
|        | Aar136F    | TCCACTGGCAACATTCACACTATTAC        |    |     |     |     |     |      |     |    |   |         |  |  |
|        | Aar136R    | TCATCCTTTTCGGTCCCTTTCTC           |    |     |     |     |     |      |     |    |   |         |  |  |
| Aar137 | FM878225.1 | AG                                | 7  | 193 | 206 | 390 | 243 | 65.6 |     |    |   |         |  |  |
|        | Aar137F    | TGGCACAAGATGAAGCTTTCAATG          |    |     |     |     |     |      |     |    |   |         |  |  |
|        | Aar137R    | TTTGCTTAAATCCACAAATAAACAATAATCTCC |    |     |     |     |     |      |     |    |   |         |  |  |
| Aar138 | FM878226.1 | AT                                | 5  | 405 | 414 | 546 | 223 | 63.2 |     |    |   |         |  |  |
|        | Aar138F    | CATGTTGAAGAACTTGTTGCAG            |    |     |     |     |     |      |     |    |   |         |  |  |
|        | Aar138R    | GATGACTAACTCGCCACAAGCAC           |    |     |     |     |     |      |     |    |   |         |  |  |
| Aar139 | FM878227.1 | ATCT                              | 14 | 141 | 196 | 340 | 238 | 63.3 |     |    |   |         |  |  |
|        | Aar139F    | TGACTTCATTGCATGTTTCAGCAC          |    |     |     |     |     |      |     |    |   |         |  |  |
|        | Aar139R    | TTGGGAGCACAGACATGTGG              |    |     |     |     |     |      |     |    |   |         |  |  |
| Aar140 | FM878228.1 | TAGA                              | 17 | 21  | 88  | 346 | NA  | NA   |     |    |   |         |  |  |
|        | Aar140F    | NA                                |    |     |     |     |     |      |     |    |   |         |  |  |
|        | Aar140R    | NA                                |    |     |     |     |     |      |     |    |   |         |  |  |
| Aar141 | FM878229.1 | AAA                               | 5  | 343 | 357 | 801 | 177 | 64.1 | Hex | 62 | M | 171     |  |  |
|        | Aar141F    | ACCACAAGAGGGAGTTTCTTGC            |    |     |     |     |     |      |     |    |   |         |  |  |
|        | Aar141R    | TGTGTGTGTGTTTGCCTTTGTTG           |    |     |     |     |     |      |     |    |   |         |  |  |
| Aar142 | FM878230.1 | AAA                               | 5  | 412 | 426 | 669 | 264 | 65.0 | Hex | 63 | P | 260-277 |  |  |
|        | Aar142F    | GAAAGAGAACTCCAAATCACTCTGCTG       |    |     |     |     |     |      |     |    |   |         |  |  |
|        | Aar142R    | CAACAAGAATCCTCTGTTCCCTAATCC       |    |     |     |     |     |      |     |    |   |         |  |  |
| Aar143 | FM878231.1 | ACAA                              | 7  | 337 | 364 | 605 | 258 | 65.0 |     |    |   |         |  |  |
|        | Aar143F    | TGAGGTGTTCTGGCACTGCAC             |    |     |     |     |     |      |     |    |   |         |  |  |
|        | Aar143R    | CCATTGTTCCAGGGAGTTCAGC            |    |     |     |     |     |      |     |    |   |         |  |  |
| Aar144 | FM878232.1 | AA                                | 5  | 257 | 266 | 543 | 224 | 63.3 | Hex | 61 | P | 220-224 |  |  |
|        | Aar144F    | ACACAGGCACACACATACCC              |    |     |     |     |     |      |     |    |   |         |  |  |
|        | Aar144R    | GCACCTGCACTGAGTAACTTTGC           |    |     |     |     |     |      |     |    |   |         |  |  |
| Aar145 | FM878233.1 | TT                                | 6  | 225 | 236 | 332 | 236 | 64.3 | Hex | 62 | P | 236-238 |  |  |
|        | Aar145F    | AGAGAGCAGCAATGGCTCTGG             |    |     |     |     |     |      |     |    |   |         |  |  |
|        | Aar145R    | GGAGCGCCTGCAGTGAATATC             |    |     |     |     |     |      |     |    |   |         |  |  |
| Aar146 | FM878234.1 | GT                                | 5  | 361 | 370 | 521 | 187 | 65.0 |     |    |   |         |  |  |
|        | Aar146F    | AGACACTCTGCCACACACCTG             |    |     |     |     |     |      |     |    |   |         |  |  |
|        | Aar146R    | TGCCACTTCCAGAGCAGTTCC             |    |     |     |     |     |      |     |    |   |         |  |  |
| Aar147 | FM878235.1 | AAGAG                             | 45 | 291 | 515 | 601 | 376 | 60.9 |     |    |   |         |  |  |
|        | Aar147F    | AGCAAGGCCTGTAGCAGTAGG             |    |     |     |     |     |      |     |    |   |         |  |  |
|        | Aar147R    | AAATAAATGTCCATCTACTCAGGTATTATGA   |    |     |     |     |     |      |     |    |   |         |  |  |
| Aar148 | FM878236.1 | GT                                | 5  | 147 | 156 | 592 | 232 | 65.0 | Fam | 63 | M | 237     |  |  |
|        | Aar148F    | TCCTGAGGCTGAGAGCAATGTG            |    |     |     |     |     |      |     |    |   |         |  |  |
|        | Aar148R    | GTCCTGTGGTTGATAATGGCAGTG          |    |     |     |     |     |      |     |    |   |         |  |  |
| Aar149 | FM878237.1 | AG                                | 6  | 261 | 272 | 442 | 236 | 63.6 |     |    |   |         |  |  |
|        | Aar149F    | CAAAGGAGGCCAAGAGAATGC             |    |     |     |     |     |      |     |    |   |         |  |  |
|        | Aar149R    | TGGATTGCTGCGAGGACTTC              |    |     |     |     |     |      |     |    |   |         |  |  |
| Aar150 | FM878238.1 | TG                                | 5  | 443 | 452 | 652 | 236 | 63.7 |     |    |   |         |  |  |
|        | Aar150F    | TGCTGGCCAGTGCTATCTAAATG           |    |     |     |     |     |      |     |    |   |         |  |  |
|        | Aar150R    | TCACTGCAGAGTTCCAATGGTTC           |    |     |     |     |     |      |     |    |   |         |  |  |
| Aar151 | FM878239.1 | AAAA                              | 5  | 173 | 192 | 325 | 215 | 65.3 |     |    |   |         |  |  |
|        | Aar151F    | GGGCTGTCACGGACCTGAAC              |    |     |     |     |     |      |     |    |   |         |  |  |
|        | Aar151R    | TTGCCAACCTCCCACATTCC              |    |     |     |     |     |      |     |    |   |         |  |  |





|        |            |                                 |    |     |     |     |     |      |     |    |   |         |  |  |
|--------|------------|---------------------------------|----|-----|-----|-----|-----|------|-----|----|---|---------|--|--|
|        | Aar171R    | NA                              |    |     |     |     |     |      |     |    |   |         |  |  |
| Aar172 | FM878260.1 | AA                              | 5  | 201 | 210 | 327 | 222 | 62.0 |     |    |   |         |  |  |
|        | Aar172F    | AATGCCTGCCTCGTAGTCTCA           |    |     |     |     |     |      |     |    |   |         |  |  |
|        | Aar172R    | GATCTTATTTAAAGGCTTACTTGAAACAGAA |    |     |     |     |     |      |     |    |   |         |  |  |
| Aar173 | FM878261.1 | TGT                             | 5  | 253 | 267 | 643 | 551 | 65.2 | Hex | 58 | P | 303-309 |  |  |
|        | Aar173F    | GGTGGCCAAATGGCTCTAAGG           |    |     |     |     |     |      |     |    |   |         |  |  |
|        | Aar173R    | TGAAAGCATGGCCCTGAAATG           |    |     |     |     |     |      |     |    |   |         |  |  |
| Aar174 | FM878262.1 | TC                              | 8  | 69  | 84  | 649 | 178 | 65.2 |     |    |   |         |  |  |
|        | Aar174F    | GCAAGGAGATATGGCAGAGTAATGAAAG    |    |     |     |     |     |      |     |    |   |         |  |  |
|        | Aar174R    | TCCGCTTCTCCTCCTTGACTG           |    |     |     |     |     |      |     |    |   |         |  |  |
| Aar175 | FM878263.1 | AG                              | 7  | 215 | 228 | 258 | NA  | NA   |     |    |   |         |  |  |
|        | Aar175F    | NA                              |    |     |     |     |     |      |     |    |   |         |  |  |
|        | Aar175R    | NA                              |    |     |     |     |     |      |     |    |   |         |  |  |
| Aar176 | FM878264.1 | AGAG                            | 9  | 361 | 396 | 701 | 456 | 64.3 |     |    |   |         |  |  |
|        | Aar176F    | CCAAAGACTTGATACATTGCTTCAGTG     |    |     |     |     |     |      |     |    |   |         |  |  |
|        | Aar176R    | CAGGGTCCAGGGAGTCTGC             |    |     |     |     |     |      |     |    |   |         |  |  |
| Aar177 | FM878265.1 | TT                              | 5  | 455 | 464 | 553 | 239 | 64.5 | Fam | 62 | P | 239-243 |  |  |
|        | Aar177F    | AATTGCACCAGTCAAGGAACACTG        |    |     |     |     |     |      |     |    |   |         |  |  |
|        | Aar177R    | AGCATGTTGGGTCCATGCTG            |    |     |     |     |     |      |     |    |   |         |  |  |
| Aar178 | FM878266.1 | AAGG                            | 28 | 37  | 148 | 706 | NA  | NA   |     |    |   |         |  |  |
|        | Aar178F    | NA                              |    |     |     |     |     |      |     |    |   |         |  |  |
|        | Aar178R    | NA                              |    |     |     |     |     |      |     |    |   |         |  |  |
| Aar179 | FM878267.1 | AC                              | 7  | 413 | 426 | 663 | 207 | 64.4 |     |    |   |         |  |  |
|        | Aar179F    | GGAATTTCAAATGGGATTGTTTATGC      |    |     |     |     |     |      |     |    |   |         |  |  |
|        | Aar179R    | TTGTGTGACGTGGCATCTG             |    |     |     |     |     |      |     |    |   |         |  |  |
| Aar180 | FM878268.1 | TG                              | 5  | 201 | 210 | 363 | 235 | 63.3 |     |    |   |         |  |  |
|        | Aar180F    | GGATGGAGGAAGGAAGGAAGG           |    |     |     |     |     |      |     |    |   |         |  |  |
|        | Aar180R    | CATTCTAACACCCTCTCTGCAAATG       |    |     |     |     |     |      |     |    |   |         |  |  |
| Aar181 | FM878269.1 | CTCTT                           | 37 | 61  | 245 | 382 | 329 | 64.9 |     |    |   |         |  |  |
|        | Aar181F    | GGCAGCCTTGCCCTGCTA              |    |     |     |     |     |      |     |    |   |         |  |  |
|        | Aar181R    | CTGCCATCACGTTGGCTAATTTT         |    |     |     |     |     |      |     |    |   |         |  |  |
| Aar182 | FM878270.1 | AG                              | 5  | 371 | 380 | 454 | 245 | 63.8 |     |    |   |         |  |  |
|        | Aar182F    | ATAAACCACTCGCGGGAAGC            |    |     |     |     |     |      |     |    |   |         |  |  |
|        | Aar182R    | TTCCTTGTTGCTGCTCTTGAG           |    |     |     |     |     |      |     |    |   |         |  |  |
| Aar183 | FM878271.1 | TT                              | 5  | 59  | 68  | 546 | 239 | 64.9 |     |    |   |         |  |  |
|        | Aar183F    | TCATAACTGTTTGGTTGGGTTTGGATT     |    |     |     |     |     |      |     |    |   |         |  |  |
|        | Aar183R    | GCTCGAGAGCTTCCCAGCAG            |    |     |     |     |     |      |     |    |   |         |  |  |
| Aar184 | FM878272.1 | GA                              | 5  | 67  | 76  | 215 | 182 | 65.1 | Hex | 63 | M | 180     |  |  |
|        | Aar184F    | CAGCATGTGCATACAAAGGTCTCC        |    |     |     |     |     |      |     |    |   |         |  |  |
|        | Aar184R    | CGGCACATGCAGCTTGAATC            |    |     |     |     |     |      |     |    |   |         |  |  |
| Aar185 | FM878273.1 | AG                              | 6  | 185 | 196 | 365 | 272 | 65.3 |     |    |   |         |  |  |
|        | Aar185F    | GGCTCTAGCTGGCTCAGTTCCTC         |    |     |     |     |     |      |     |    |   |         |  |  |
|        | Aar185R    | TGCCATGTAGTTGGACCTTCC           |    |     |     |     |     |      |     |    |   |         |  |  |
| Aar186 | FM878274.1 | AC                              | 6  | 241 | 252 | 416 | 224 | 63.7 |     |    |   |         |  |  |
|        | Aar186F    | TTTCTTCAACTTACCCTGGCTGAAC       |    |     |     |     |     |      |     |    |   |         |  |  |
|        | Aar186R    | ATTCTGGAGTTCTAATCTTGAGAATTAGTGG |    |     |     |     |     |      |     |    |   |         |  |  |
| Aar187 | FM878275.1 | ACAC                            | 9  | 581 | 616 | 685 | 247 | 63.6 | Hex | 62 | P | 239-253 |  |  |
|        | Aar187F    | TGCTGAAATGAAGGTGTCAAACCTG       |    |     |     |     |     |      |     |    |   |         |  |  |
|        | Aar187R    | CCATGCATTAGAATGCCATAAAC         |    |     |     |     |     |      |     |    |   |         |  |  |
| Aar188 | FM878276.1 | GAGA                            | 8  | 77  | 108 | 615 | 223 | 64.4 |     |    |   |         |  |  |
|        | Aar188F    | GAGCCTCGTGGCAGGATAGTG           |    |     |     |     |     |      |     |    |   |         |  |  |
|        | Aar188R    | TTCGTTGTCTGTGTGCCATCC           |    |     |     |     |     |      |     |    |   |         |  |  |
| Aar189 | FM878277.1 | GAGA                            | 5  | 45  | 64  | 303 | 195 | 65.1 |     |    |   |         |  |  |
|        | Aar189F    | TCCAGCATTGCATAGGTGTGAATAAC      |    |     |     |     |     |      |     |    |   |         |  |  |
|        | Aar189R    | TCAGCAGCACACTTGGCTAGGG          |    |     |     |     |     |      |     |    |   |         |  |  |
