# Supplementary material for: Hybridization but No Evidence for Backcrossing and Introgression in a Sympatric Population of Great Reed Warblers and Clamorous Reed Warblers
Source: PubMed Central journal article supplement (PMC3288047; doi:10.1371/journal.pone.0031667), 2012-02-27
Supplement: pone.0031667.s003.pdf [file pone.0031667.s003.pdf]

**Table S3** Number of alleles ( $N_A$ ), range of fragment length (bp), expected and observed heterozygosity, Wright's  $F_{IS}$ , and two-tailed  $P$ -value for deviations of Hardy-Weinberg equilibrium ( $P_{HW}$ ; shown when  $P < 0.1$ ) in great and clamorous reed warblers. Also given are null allele frequencies (Null freq.) in the great reed warbler.

| Locus name                   | Accession number | Great reed warbler |         |           |           |          |          |            | Clamorous reed warbler |         |           |           |          |          |
|------------------------------|------------------|--------------------|---------|-----------|-----------|----------|----------|------------|------------------------|---------|-----------|-----------|----------|----------|
|                              |                  | $N_A$              | Range   | $H_{EXP}$ | $H_{OBS}$ | $F_{IS}$ | $P_{HW}$ | Null freq. | $N_A$                  | Range   | $H_{EXP}$ | $H_{OBS}$ | $F_{IS}$ | $P_{HW}$ |
| Aar18                        | FM878106.1       | 26                 | 255-327 | 0.96      | 0.96      | 0.00     |          | -0.01      | 4                      | 252-256 | 0.70      | 0.57      | 0.19     |          |
| Aar19                        | FM878107.1       | 2                  | 221-222 | 0.43      | 0.61      | -0.42    |          | -0.38      | 4                      | 215-221 | 0.71      | 0.47      | 0.34     | 0.088    |
| Aar27                        | FM878115.1       | 2                  | 224-226 | 0.49      | 0.54      | -0.09    |          | -0.06      | 2                      | 224-226 | 0.07      | 0.07      | 0.00     |          |
| Aar33                        | FM878121.1       | 8                  | 211-239 | 0.77      | 0.85      | -0.11    |          | -0.07      | 5                      | 211-227 | 0.83      | 0.45      | 0.45     | 0.017    |
| Aar36                        | FM878124.1       | 25                 | 283-425 | 0.97      | 0.89      | 0.08     |          | 0.03       | 12                     | 283-434 | 0.97      | 0.75      | 0.23     | 0.068    |
| Aar39                        | FM878127.1       | 9                  | 211-233 | 0.74      | 0.56      | 0.25     | 0.010    | 0.12       | 5                      | 205-235 | 0.27      | 0.21      | 0.21     |          |
| Aar47                        | FM878135.1       | 10                 | 290-304 | 0.83      | 0.71      | 0.13     |          | 0.07       | 10                     | 290-300 | 0.64      | 0.73      | -0.15    |          |
| Aar57                        | FM878145.1       | 9                  | 250-294 | 0.83      | 0.82      | 0.01     |          | 0.00       | 9                      | 245-284 | 0.89      | 0.55      | 0.39     | 0.008    |
| Aar62                        | FM878150.1       | 6                  | 159-164 | 0.76      | 0.68      | 0.10     |          | 0.04       | 5                      | 163-167 | 0.61      | 0.60      | 0.02     |          |
| Aar84                        | FM878172.1       | 14                 | 355-449 | 0.88      | 0.89      | -0.01    |          | -0.02      | 9                      | 365-395 | 0.80      | 0.87      | -0.08    |          |
| Aar86                        | FM878174.1       | 6                  | 274-294 | 0.56      | 0.44      | 0.20     |          | 0.10       | 6                      | 270-294 | 0.76      | 0.80      | -0.05    |          |
| Aar111                       | FM878199.1       | 4                  | 369-373 | 0.30      | 0.30      | 0.01     |          | 0.08       | 2                      | 371-373 | 0.20      | 0.21      | -0.08    |          |
| Aar119                       | FM878207.1       | 4                  | 153-156 | 0.26      | 0.18      | 0.32     | 0.068    | 0.14       | 5                      | 151-157 | 0.72      | 0.73      | -0.02    |          |
| Aar142                       | FM878230.1       | 17                 | 260-296 | 0.85      | 0.78      | 0.09     |          | 0.03       | 11                     | 257-282 | 0.88      | 0.87      | 0.02     |          |
| Aar144                       | FM878232.1       | 5                  | 221-225 | 0.72      | 0.68      | 0.06     |          | 0.02       | 4                      | 219-222 | 0.58      | 0.60      | -0.03    |          |
| Aar145                       | FM878233.1       | 2                  | 236-237 | 0.43      | 0.39      | 0.09     |          | 0.03       | 2                      | 235-236 | 0.07      | 0.07      | 0.00     |          |
| Aar158                       | FM878246.1       | 3                  | 251-253 | 0.14      | 0.14      | -0.04    |          | -0.07      | 1                      | 251     | 0.00      | 0.00      | NA       |          |
| Aar173                       | FM878261.1       | 6                  | 297-313 | 0.64      | 0.59      | 0.07     |          | 0.02       | 11                     | 297-318 | 0.93      | 0.91      | 0.02     |          |
| Aar187                       | FM878275.1       | 10                 | 231-253 | 0.86      | 0.89      | -0.04    |          | -0.03      | 3                      | 233-241 | 0.42      | 0.53      | -0.28    |          |
| Ase18 <sup>#</sup>           | AJ276375.1       | 3                  | 163-175 | 0.17      | 0.18      | -0.06    |          | -0.09      | 8                      | 165-186 | 0.79      | 0.62      | 0.22     |          |
| Calex-01 <sup>□</sup>        | AM072445.1       | 3                  | 223-227 | 0.43      | 0.50      | -0.16    |          | -0.10      | 1                      | 225     | 0.00      | 0.00      | NA       |          |
| DkiD126 Tgu EST <sup>£</sup> | AY769692.1       | 2                  | 243-244 | 0.25      | 0.14      | 0.43     |          | 0.15       | 1                      | 243     | 0.00      | 0.00      | NA       |          |
| Tgu03 <sup>§</sup>           | DV955012.1       | 7                  | 260-276 | 0.74      | 0.85      | -0.15    |          | -0.09      | 8                      | 266-280 | 0.88      | 1.00      | -0.14    |          |

<sup>#</sup>Ase18F: ATCCAGTCTTCGCAAAGCC; Ase18R: TGCCCCAGAGGGAAGAAG; Ta: 58; Richardson *et al.* (2000) *Mol Ecol* 9: 2226-2231

<sup>□</sup>Calex-01F: CTTCTCCATTGTTGCACCTCCAGT; Ase18R: GTTTCTTCTTGACTTGGCCTGAGGTTTAGGTT; Ta: 58; Kupper *et al.* (2007) *Mol Ecol Notes* 7: 35-39

<sup>£</sup>DkiD126 Tgu EST-F: ACCTGGCTGCCCAAGT; DkiD126 Tgu EST-R: TCAAGGCCAGGCTGGAT; Ta: 58; DA Dawson, unpublished; King *et al.* (2005) 5: 569-571

<sup>§</sup>Tgu03F: TCTCAGCATCAGTGTGTTCTGTAC; Tgu03R: TTTGCTTGGGATTGAAGTGA; Ta: 58; Slate *et al.* (2007) *BMC Genomics* 8: 52
